1 **Gnrh1-induced responses are indirect in female medaka Fsh cells**

2 Kjetil Hodne<sup>+</sup>, Romain Fontaine<sup>+</sup>, Eirill Ager-Wick, Finn-Arne Weltzien\*

3

4 Department of Basic Sciences and Aquatic Medicine, Faculty of Veterinary Medicine,  
5 Norwegian University of Life Sciences, Oslo, Norway

6

7 Short title: Gnrh1-induced responses in Fsh cells are indirect in medaka

8

9 <sup>+</sup> These authors contributed equally to this work

10 \* Corresponding author at the above address; Email: [finn-arne.weltzien@nmbu.no](mailto:finn-arne.weltzien@nmbu.no); Tel: +47  
11 67232036

12

13

14 KEY WORDS: calcium, cell-cell communication, gnrh receptor, gonadotropins, pituitary

15

16 FUNDING: Research Council of Norway, Grant no 248828 and 244461, and the Norwegian  
17 University of Life Sciences

18

19 DISCLOSURE STATEMENT: The authors have nothing to disclose.

20

21 ACKNOWLEDGEMENTS: We thank Drs Susann Burow and Rasoul Nourizadeh-Lillabadi  
22 for help with development of the medaka transgenic line, *tg(fshb:DsRed2)*, and Dr Felix  
23 Loosli (Karlsruhe Institute of Technology, Germany) for kindly providing the I-SceI-MCS-  
24 leader-Gfp-trailer plasmid.

25

26 NOMENCLATURE: We use the following nomenclature: “GnRH” for protein names and  
27 “*GnRH*” for gene names in general or in mammals, and “Gnrh” for protein names and “*gnrh*”  
28 for gene names in teleost fish.

29

30 ABSTRACT

31 Reproductive function in vertebrates is stimulated by gonadotropin-releasing hormone  
32 (GnRH) that controls the synthesis and release of the two pituitary gonadotropins, follicle-  
33 stimulating hormone (FSH) and luteinizing hormone (LH). FSH and LH, which regulates  
34 different stages of gonadal development, are produced by two different cell types in the fish  
35 pituitary, in contrast to mammals and birds, thus allowing the investigation of their  
36 differential regulation. In the present work, we show by fluorescent *in situ* hybridization that  
37 Lh cells in adult female medaka express Gnrh receptors, whereas Fsh cells do not. This is  
38 confirmed by patch clamp recordings and cytosolic Ca<sup>2+</sup> measurements on dispersed pituitary  
39 cells, where Lh cells, but not Fsh cells, respond to Gnrh1 by increased action potential  
40 frequencies and cytosolic Ca<sup>2+</sup> levels. In contrast, both Fsh and Lh cells are able to respond  
41 electrically and by elevating the cytosolic Ca<sup>2+</sup> levels to Gnrh1 in brain-pituitary tissue slices.  
42 Using Ca<sup>2+</sup> uncaging in combination with patch clamp recordings and cytosolic Ca<sup>2+</sup>  
43 measurements, we show that Fsh and Lh cells form homo- and heterotypic networks in the  
44 pituitary. Taken together, these results show that the effects of Gnrh1 on Fsh release in adult  
45 female medaka is indirect, likely mediated via Lh cells.

46

## 47 INTRODUCTION

48 In all vertebrates, it is suggested that gonadotropin-releasing hormone (GnRH) is the  
49 main stimulator of the synthesis and release of the two pituitary gonadotropins: follicle-  
50 stimulating hormone (FSH) and luteinizing hormone (LH). GnRH neurons originate in the  
51 preoptico-hypothalamic area, but whereas in mammals they release their neuropeptide to the  
52 portal capillary system at the base of the hypothalamus termed the median eminence (1) and  
53 further to the gonadotrope cells through the circulation, teleost fish do not display a typical  
54 median eminence. Instead, the neurosecretory fibers from the brain project into the *pars*  
55 *distalis* of the pituitary (2). These neurons either directly innervate the different endocrine  
56 cells or terminate in the extravascular space, adjacent to blood capillaries surrounding the  
57 endocrine cells (2-5). Additionally, whereas FSH and LH are produced by the same pituitary  
58 cells in mammals (6), they are produced by two distinct cell types in teleosts (7-10). This  
59 makes teleosts useful models to investigate the differential regulation of FSH and LH  
60 synthesis and release.

61 FSH and LH control different stages of gamete development both in mammals and  
62 teleost fish, with FSH mainly stimulating follicular development in females and LH  
63 regulating final maturation and ovulation (11-15). In mammals, the differential regulation of  
64 FSH and LH appears to depend on a pulsatile release of GnRH, with low-frequency pulses  
65 favoring FSH response and high-frequency pulses favoring LH response, especially in terms  
66 of gonadotropin subunit gene expression (16-18). Activation of GnRH receptors on  
67 gonadotrope cells elicit increased cytosolic  $\text{Ca}^{2+}$  levels ( $[\text{Ca}^{2+}]_i$ ) with a subsequent alteration  
68 in membrane potential and hormone release by exocytosis. A similar response to GnRH has  
69 been shown also in teleost fish (19-25), although a GnRH pulsatile or frequency dependent  
70 release of gonadotropins has not been demonstrated.

71 As many as 5 or 6 different Gnrh receptor (Gnrhr) paralogs have be identified in  
72 several teleost species, as opposed to 1 or 2 paralogs being present in mammals. The high  
73 number of Gnrhr paralogs in fish opens the possibility for differential regulation of Fsh and  
74 Lh synthesis and release through differential expression of receptors in the two gonadotrope  
75 cell types (26-29).

76 The importance of GnRH signaling seems to differ for the two gonadotropins. In the  
77 infertile natural GnRH mutant (*hpg*) mouse, FSH serum levels are reduced by 50%, while LH  
78 levels are non-detectable (30,31). Likewise, in the teleost medaka (*Oryzias latipes*), Gnrh  
79 knockout in females prevented ovulation and reduced expression of *lhb*, but did not affect  
80 *fshb* expression or follicle development (13). These results suggest that LH cell function is  
81 dependent on GnRH stimulation, while adequate FSH synthesis and release may continue in  
82 the absence of GnRH. Indeed, some reports suggest that FSH release is more constitutive in  
83 nature and closely tied to its synthesis (32), but a detailed model for the differential  
84 regulation of FSH and LH is still lacking. In addition to differential regulation by GnRH,  
85 precise regulation of FSH and LH release may depend on cell-cell communication. A  
86 coordinated GnRH-induced LH release requires communication between LH cells through  
87 gap junctions, seemingly in both mammals and teleosts (33,34).

88 In this work, we addressed the question, does Gnrh1 regulate Fsh cells and Lh cells  
89 through similar direct pathways, or via different mechanisms? To answer this question we  
90 used transgenic lines to clearly distinguish Fsh cells from Lh cells, toward the following  
91 objectives: 1) Determine whether hypophysiotropic Gnrh1 neurons project to Fsh and/or Lh  
92 cells in the medaka pituitary, 2) Determine which *gnrhr* paralog(s) are expressed in medaka  
93 Fsh and Lh cells, 3) Characterize the Gnrh1-induced electrical and  $[Ca^{2+}]_i$  responses of  
94 medaka Fsh and Lh cells, and 4) Assess capacity for intercellular signaling between  
95 gonadotropes in the medaka pituitary.

## 96 MATERIALS AND METHODS

### 97 **Animals**

98 In this paper, we used Japanese medaka (*Oryzias latipes*) wild-type (WT, d-rR strain),  
99 and four transgenic lines; tg(*gnrh1*:eGfp) (35), tg(*lhb*:hrGfpII) (36), tg(*fshb*:DsRed2) (this  
100 paper), double tg(*lhb*:hrGfpII/*fshb*:DsRed2) (this paper). All fish were maintained on a 14:10  
101 hr L:D cycle in a re-circulating system (28°C, pH 7.6 and conductivity of 800 µS) and fed  
102 three times a day with either live brine shrimp or pellets (Gemma, Skretting, Stavanger,  
103 Norway). Animal experiments were performed according to the recommendations of the Care  
104 and Welfare of Research Animals at the Norwegian University of Life Sciences, and under  
105 the supervision of authorized investigators.

106

### 107 **Generation of tg(*fshb*:DsRed2) and double tg(*lhb*:hrGfpII/*fshb*:DsRed2) transgenic** 108 **lines**

109 The medaka *fshb*:DsRed2 transgenic line, tg(*fshb*:DsRed2), was generated using  
110 DsRed2-N1 vector (Clontech, California, USA.), digested by NcoI and NotI restriction  
111 enzymes (New England Biolabs, USA) and cloned into I-SceI-MCS-leader-Gfp-trailer  
112 plasmid, generating a I-SceI-MCS-leader-DsRed2-trailer vector. The 3833 bp endogenous  
113 medaka *fshb* promoter sequence was amplified by PCR using primers (see Table 1) with  
114 overhang to KpnI and XhoI and cloned into pGEM-T Easy vector. The vector was then  
115 amplified, digested with KpnI and XhoI (New England Biolabs, Massachusetts, USA), and  
116 the DNA fragment was purified and cloned into the I-SceI-MCS-leader-DsRed2-trailer  
117 vector.

118 One-cell stage medaka embryos were injected using a manual microinjector  
119 (Picospritzer III, Parker Automation, Ohio, USA) with 10 µg/µl transgenic vector diluted in  
120 0.5x commercial meganuclease buffer (Roche Diagnostics, Basel, Switzerland), and with 1

121 U/μl meganuclease I-SceI and 0.1% phenol red added just prior to use. Injected fish (F0)  
122 were raised to adulthood and incrossed. Embryos were screened for DsRed2 by PCR at 5-6  
123 days post fertilization, to determine founders. F0 founders were then crossed with WT and  
124 the resulting offspring (F1) were incrossed. Mature F2 were crossed with WT and F2 fish  
125 producing 90-100% Rfp-positive progeny were defined to be homozygous: *tg(fshb:DsRed2)*.  
126 The identified homozygous F2 fish were incrossed to produce a stable homozygous line.  
127 Finally, homozygous *tg(fshb:DsRed2)* were crossed with homozygous *tg(lhb:hrGfpII)* to  
128 obtain double *tg(lhb:hrGfp-II/fshb:DsRed2)* transgenic animals.

129

### 130 **qPCR**

131 Total RNA was isolated from 6 adult female medaka (WT) pituitaries using Trizol  
132 (Ambion, USA) and cDNA was prepared from 30 ng total RNA. Specific primers for all  
133 target genes (Table 1) were designed with Primer3Plus software and validated based on a  
134 series of cDNA dilutions (to assess efficiency and sensitivity) and melting curve analysis (to  
135 assess specificity). The qPCR assays were performed as previously described (37) using the  
136 LightCycler96 with SYBR Green I (Roche, Switzerland). All qPCR assays were run in  
137 duplicate on cDNA diluted 1:5. PCR cycling parameters were 300 s at 95°C followed by 40  
138 cycles at 95°C for 10 s, 60°C for 10 s and 72°C for 6 s, before melting curve analysis to assess  
139 qPCR product specificity. Relative expression levels were calculated as described (37), using  
140 the combination of three reference genes (*rna18s*, *rpl7*, *gapdh*), according to RefFinder (38).

141

### 142 **Fluorescence *in situ* hybridization**

143 Fluorescence *in situ* hybridization (FISH) for *lhb*, *fshb*, *dsred2*, *gnrhr2a*, *gnrhr1b* and  
144 *gnrhr2b* were performed as described previously (39) on 6-month old mature females from  
145 *tg(fshb:DsRed2)*, *tg(lhb:hrGfpII)* or WT lines (see figure legends for details). First, we

146 investigated the % identity between the RNA probes and the target *Gnrhr* mRNA (Table 2),  
147 and could observed that there were important sequence differences between a RNA probe and  
148 the non-targeted *gnrhr* mRNA, thus making unlikely the possibility of unspecific cross  
149 reaction Following, riboprobes were cloned into PCR-II TOPO (Thermo Fisher Scientific,  
150 Massachusetts, USA) or PGEM-T Easy Vector (Promega, Wisconsin, USA) using primers  
151 shown in Table 1 and cDNA from medaka brain and pituitary total RNA. After PCR with  
152 M13 reverse and forward primers, sense and antisense probes were synthesized using SP6 or  
153 T7 polymerase (Promega) and conjugated with either digoxigenin (DIG, Roche) or  
154 fluorescein (FITC, Roche). The fish were euthanized with an overdose of tricaine (MS222;  
155 Sigma-Aldrich, Missouri, USA) and tissues fixed by cardiac perfusion with 4%  
156 paraformaldehyde (PFA; Electron Microscopy Sciences, Pennsylvania, USA). Free floating  
157 60  $\mu$ m parasagittal sections of brain and pituitary were made with a vibratome (VT1000S  
158 Leica, Wetzlar, Germany). Tissue slices were incubated with hybridization probes for 18 h at  
159 55°C and then incubated with sheep anti-DIG and anti-FITC antibodies conjugated with  
160 peroxidase (POD; 1:250; Roche) for probe labeling using the InSituPro VSI robot (Intavis,  
161 Germany). Finally, the signal was revealed using custom made TAMRA-conjugated and  
162 FITC-conjugated tyramides (39).

163

#### 164 **Immunofluorescence**

165 Immunofluorescence (IF) was performed on free floating 60  $\mu$ m parasagittal sections  
166 as described previously (39). Briefly, brains and pituitaries from 6-month old *tg(gnrhl:eGfp)*  
167 females were collected and fixed with 4% PFA. Tissues were then embedded in 3% agarose  
168 before sectioning with a vibratome. Then, tissues were blocked for 1 h and incubated with  
169 primary custom-made polyclonal rabbit anti-medakaLh $\beta$  (1:2000; AB\_2732044) and anti-  
170 medakaFsh $\beta$  (1:500; AB\_2732042), previously validated (40). For Fsh $\beta$  IF, epitope retrieval

171 treatment using 2 N HCL (dissolved in phosphate buffered saline solution with 0.1% Tween,  
172 PBST) for 1 h at 37°C was necessary prior to blocking and antibody incubation. Signal was  
173 amplified with secondary antibody AlexaFluor 555 (1:1000; AB\_2535850 Invitrogen).  
174 Sections were mounted in Vectashield Antifade Mounting Medium (Vector laboratories,  
175 California, USA) and imaged as described below.

176

### 177 **DiI injection**

178 To label pituitary blood vessels, 6-month old siblings of the cross between  
179 *tg(gnrhl:eGfp)* and *tg(fshb:DsRed2)*, i.e. *tg(gnrhl:eGfp/fshb:DsRed2)*, were euthanized with  
180 an overdose of tricaine. Cardiac perfusion with DiIC18(5)-DS (1,1'-Dioctadecyl-3,3',3'-  
181 Tetramethylindodicarbocyanine-5,5'-Disulfonic Acid; Thermo Fisher Scientific) diluted in  
182 4% paraformaldehyde (PFA) was performed as described in (41).

183

### 184 **Confocal Imaging**

185 For whole pituitary imaging, pituitaries from *tg(gnrhl:eGfp)* females were collected,  
186 fixed in 4% PFA and mounted between slide and coverslip with spacers in Vectashield  
187 Antifade Mounting Medium. All confocal images were acquired using LSM710 confocal  
188 microscope (Zeiss, Oberkochen, Germany) with 25X (N.A. 0.8) or 40X (N.A. 1.2) objectives.  
189 Channels were acquired sequentially to avoid signal crossover between different filters.  
190 Images were processed using ZEN software (version 2009, Zeiss). Z-projections from  
191 confocal stacks of images were obtained using Fiji (version 2.0.0 (42)). 3D reconstruction  
192 was built using Fiji 3D viewer plugin.

193

### 194 **Primary dispersed pituitary cell culture**



195 Pituitaries were collected from 10 mature, gravid females from the *tg(lhb:hrGfpII)*  
196 and *tg(fshb:DsRed2)* lines separately following decapitation and dissociated according to  
197 (43). In brief, pooled pituitaries were digested with trypsin (2 mg/mL, Sigma-Aldrich) for 30  
198 min at 26°C, then incubated with trypsin inhibitor (1 mg/mL, Sigma-Aldrich) and DNase I  
199 Type IV (2 µg/mL, Sigma-Aldrich) for 20 min at 26°C with gentle shaking. Pituitary cells  
200 were mechanically dissociated using a glass pipette, centrifuged at 200 g and resuspended in  
201 growth medium (L-15, Life Technologies) adjusted to 280-290 mOsm with mannitol and to  
202 pH 7.75 with 10 mM NaHCO<sub>3</sub>, 1.8 mM glucose, and penicillin/streptomycin (50 U/mL of  
203 medium, Lonza, Verviers, Belgium). Dissociated cells were plated on poly-L-lysine pre-  
204 coated dishes fitted with a central glass bottom (MatTek Corporation, Ashland, MA, USA).  
205 The cell density was low to prevent intercellular contact and cultures were used within 48 h  
206 after plating to minimize changes in gene expression. Three different cell cultures were made  
207 for patch clamping and for Ca<sup>2+</sup> imaging. In each culture 2-7 primary target cells were  
208 stimulated by 1 µM GnRH1 (Bachem Americas, Inc. CA, USA).

209

#### 210 **Live brain-pituitary slices**

211 Using mature females from the *tg(lhb:hrGfpII)*, *tg(fshb:DsRed2)*, and  
212 *tg(lhb:hrGfpII/fshb:DsRed2)* lines, 150 µm brain-pituitary sections were made according to  
213 (44). In brief, following decapitation, the brain-pituitary complex was removed and  
214 embedded in 2% agarose (Sigma-Aldrich) dissolved in Ca<sup>2+</sup>- and BSA-free Extracellular  
215 Solution (ECS) (mM): NaCl 134, KCl 2.9, MgCl<sub>2</sub> 1.2, HEPES 10, and glucose 4.5. The  
216 solution was adjusted to pH 7.75 with 1 M NaOH and osmolality adjusted to 290 mOsm with  
217 mannitol before filter sterilization. Following sectioning, the brain-pituitary slices were  
218 moved to the recording chamber containing ECS with 2 mM Ca<sup>2+</sup> and 0.1% BSA.

219

## 220 **Electrophysiology**

221 All electrophysiological experiments were conducted using the perforated patch  
222 clamp technique in current clamp on either brain-pituitary slices (44) or primary dissociated  
223 cells (43) from the tg lines described above (*Live brain-pituitary slices*), and with ECS  
224 containing 2 mM Ca<sup>2+</sup> and 0.1% BSA. The experiments were conducted between 14:00 h and  
225 19:00 h. Patch pipettes were made from thick-walled borosilicate glass with 4-5 MΩ  
226 resistance. The following intracellular (IC) electrode solution was added to the patch pipette  
227 (mM): KOH 120, KCl 20, HEPES 10, sucrose 20, EGTA 0.2. The pH was adjusted to 7.2  
228 with C<sub>6</sub>H<sub>13</sub>NO<sub>4</sub>S, and osmolality to 280 mOsm with sucrose. To perforate the cell membrane  
229 amphotericin B (Sigma-Aldrich) was added to 0.24 mg/ml (see details in (44)). The electrode  
230 was coupled to a Multiclamp 700B amplifier (Molecular Devices, California, USA). The  
231 recorded signals were digitized at 4 to 10 kHz and filtered at one third of the sampling rate  
232 using a Digidata 1550B plus with hum silencer (Molecular Devices). All commands and  
233 recorded signals were handled using pClamp 10 software (Molecular Devices). Gnrh1  
234 (Bachem) was dissolved to 1 μM in filtered ECS with 0.1% BSA and applied to brain-  
235 pituitary slices or dispersed cells using 20 kPa puff ejection through a 2 MΩ pipette, 30-40  
236 μm from the target cell. The cells were visualized using an Infrared Dot Gradient Contrast  
237 (DGC) system coupled to an up-right microscope (Slicescope, Scientifica, Uckfield, UK)  
238 with a 40X water immersion objective (N.A. 0.8, Olympus, Shinjuku, Japan). The genetically  
239 labeled gonadotrope cells were visualized using a light-emitting diode light source (pE-4000  
240 CoolLED, Andover, UK). DsRed2 was excited at 550 nm and emission collected after  
241 passing a 630/75 nm bandpass filter (Chroma, Vermont, USA); hrGFPII was excited at 470  
242 nm and emission was collected after passing a 525/50 nm bandpass filter (Chroma). Data  
243 were analyzed using AxoGraph version X 1.7 ([www.axograph.com](http://www.axograph.com)) and Matlab version  
244 R2018a (Mathworks, Massachusetts, USA).

245

## 246 **Microfluorimetry**

247  $\text{Ca}^{2+}$  imaging on adult female pituitaries was performed separately for  
248 *tg(fshb:DsRed2)* and *tg(lhb:hrGfpII)* using the calcium-indicator dyes Cal-590-AM (AAT  
249 Bioquest, California, USA) for *tg(lhb:hrGfpII)*, and Fluo4-AM (ThermoFisher Scientific,  
250 Massachusetts, USA) for *tg(fshb:DsRed2)*. Dyes were loaded at 5  $\mu\text{M}$  30 min (cell culture) or  
251 60 min (brain-pituitary slices), at 27°C in 2 mL BSA-free ECS with 1  $\mu\text{L}$  20% Pluronic  
252 (Sigma), followed by 20 min in ECS with 0.1% BSA to de-esterify the dyes. Cal590 was  
253 excited at 580 nm and emission images were collected following passage through a 630 nm  
254 wavelength / 75 nm bandwidth filter (ET630/75 nm emitter, Chroma). Fluo4 was excited at  
255 470 nm and emission images were collected following passage through a 525 nm wavelength  
256 / 50 nm bandwidth filter (ET525/50 nm emitter, Chroma). Cells were imaged using a sCMOS  
257 camera (optiMOS, QImaging, British Columbia, Canada) with 50 to 80 ms exposure and 1-2  
258 Hz sampling frequency. Both light source and camera were controlled by  $\mu\text{Manger}$  software,  
259 version 1.4 (45). Relative fluorescence intensity was calculated after background subtraction  
260 as changes in fluorescence (F) divided by the average intensity of the first 15 frames ( $F_0$ ).  
261 Data were analyzed using Fiji (46).

262

## 263 **Uncaging**

264 Uncaging experiments were performed on *tg(fshb:DsRed2)* and *tg(lhb:hrGfpII)*, as  
265 well as on the double *tg(lhb:hrGfpII/fshb:DsRed2)* line. In these experiments, 5  $\mu\text{M}$  NP-  
266 EGTA (caging compound) was loaded into the cells (same procedure as the dye loading  
267 described above under Microfluorimetry) to chelate  $\text{Ca}^{2+}$ , followed by uncaging and  
268 destruction of the NP-EGTA with 50-250 ms pulses from a 405 nm laser (Laser Applied  
269 Stimulation and Uncaging system, Scientifica). The laser was pre-set at 7 mW and passed

270 through an 80/20 beam splitter before targeting the cells. The output effect was not  
271 calculated. The laser was guided and targeted at distinct regions of the cells using two  
272 galvanometer scan mirrors (one for each axis) controlled by Scientifica software developed in  
273 LabVIEW (National Instruments, Texas, USA). Laser reflection artifacts were removed post  
274 recording from the final imaging profile.

275

### 276 **General figure making**

277 Composites were assembled using Adobe Photoshop and Indesign CC (Adobe Inc,  
278 California, USA). Images were processed using ImageJ open source software (versions 1.37v  
279 and 2.0.0, National Institute of Health, USA). Photo montages were made in Adobe  
280 Photoshop, Adobe Illustrator, and Adobe Indesign CC2018 (Adobe Inc).

281 RESULTS

282 **Development of new medaka transgenic lines and mapping of gonadotrope cells in**  
283 **medaka pituitary**

284 To study medaka Fsh cells, we developed a new transgenic line (*tg(fshb:DsRed2)*) in  
285 which DsRed2 expression is controlled by the cloned 3833 bp endogenous *fshb* promotor.  
286 Following confirmation of transgene homozygosity, specificity of the DsRed2 reporter was  
287 verified using *in situ* hybridization. Multicolor fluorescent *in situ* hybridization with specific  
288 probes for *fshb* and *dsred2* showed nearly complete co-localization of the two probes,  
289 confirming that DsRed2 is a reliable marker for *fshb* cells in this line (Figure 1A-D). Fsh cells  
290 were located in the median part of the *proximalis pars distalis* (PPD). Homozygous  
291 *tg(fshb:DsRed2)* fish were crossed with the previously established *tg(lhb:hrGfpII)* line  
292 (Figure 1E-H) established by Hildahl et al (36) and recently validated by Fontaine et al (47),  
293 to obtain the double *tg(lhb:hrGfpII/fshb:DsRed2)*. In the double *tg* line, the two cell types  
294 expressing either *fshb* or *lhb* were clearly separated (Figure 1I-L). Fsh and Lh cells were  
295 localized in the PPD, with Fsh cells in close proximity of the Lh cells. However, while Lh  
296 cells were localized in the ventral and lateral part of the PPD, Fsh cells were localized more  
297 medially.

298

299 **Localization of Gnrh1 fibers within the medaka pituitary**

300 To investigate the location of the hypophysiotropic Gnrh1 neuron fibers, we utilized  
301 the established *tg(gnrh1:eGfp)* medaka (36). The majority of the PPD was well innervated by  
302 Gnrh1 projections (Figure 2A and B), with most fibers reaching the ventral and lateral PPD  
303 where Lh cells are located. Immunofluorescence to localize Fsh $\beta$  (Figure 2C-F) and Lh $\beta$   
304 (Figure 2G-J) on *tg(gnrh1:eGfp)* pituitary slices showed that Gnrh1 projections were found in  
305 the proximity of both gonadotrope cell types. In fact, Gnrh1 fibers project throughout the

306 whole PPD, passing next to Fsh cells and reaching the ventral and lateral surface, where Lh  
307 cells are localized. Using fish perfused with DiI to visualize blood vessels we observed that  
308 GnRh1 projections also followed the path of the blood vessels. (Figure 2K and L).

309

### 310 **Expression of *gnrhr* in Fsh and Lh cells**

311 To further explore how GnRh1 regulates Fsh and Lh we used qPCR to measure  
312 transcripts of all four *gnrhr* paralogs identified in the medaka genome. While the four genes  
313 were cloned from brain RNA, the qPCR assays revealed expression of only three receptor  
314 genes in the pituitary (Figure 3A): *gnrhr1b*, *gnrhr2a* and *gnrhr2b*. Expression of *gnrhr2c* was  
315 not detected in any of the pituitary samples. To identify cell specific expression, we used  
316 double color fluorescent *in situ* hybridization combining each *gnrhr* with either *fshb* or *lhb*  
317 (figure 3B-Z). *In situ* probes were designed to minimize the chances for cross reaction  
318 between the probes and target *gnrhr* mRNA (Table 2). The results showed that *gnrhr1b* is  
319 expressed in the posterior part of the pituitary in some of the most posterior *lhb* cells but not  
320 in *fshb* cells. *gnrhr2a* is expressed in the ventral surface of the pituitary, almost exclusively in  
321 *lhb* cells and never in *fshb* cells. Indeed, a near full co-localization was observed with only a  
322 few extra cells expressing *gnrhr2a* without *lhb*. Finally, *gnrhr2b* is expressed in the posterior  
323 part of the pituitary, in a similar region to *gnrhr1b*, but was found in very few *lhb* cells (fewer  
324 than for *gnrhr1b*), and never in *fshb* cells. Thus, using *in situ* hybridization, we found no  
325 evidence of *gnrhr* expression in *fshb* cells.

326

### 327 **Effect of GnRh1 on Fsh and Lh cells in dispersed pituitary cell culture**

328 To further explore and validate the *in situ* hybridization results we performed a series  
329 of patch clamp and Ca<sup>2+</sup> imaging experiments in which we stimulated dissociated medaka  
330 pituitary cells with GnRh1. These experiments were conducted 24-48 h after plating the cells.

331           During the initial current clamp recordings, we observed spontaneous firing of action  
332 potentials in 60% (n = 20) of the Fsh cells (Figure 4A), similar to our previous results on  
333 medaka Lh cells (21,22,43). The spontaneous firing of Fsh cells occurred in cells with  
334 oscillating membrane potential around -45 to -40 mV with the action potential often  
335 overshooting 0 mV (liquid junction potential not corrected for). The firing frequency of Fsh  
336 cells ranged from 0.5 to 3 Hz.

337           Consistent with the *in situ* hybridization results indicating that Lh cells express *gnrhr*  
338 whereas Fsh cells do not, we found a biphasic response (electrical and  $[Ca^{2+}]_i$ ) to Gnrh1 in Lh  
339 cells (Figure 4B and C). The electrical response consisted of an initial membrane  
340 hyperpolarization followed by depolarization and a robust increase in action potential  
341 frequency (Figure 4B). This response reflects the changes in  $[Ca^{2+}]_i$  with the initial membrane  
342 hyperpolarization being due to  $Ca^{2+}$  release from internal stores and subsequent activation of  
343  $Ca^{2+}$ -activated  $K^+$  channels. This initial release of  $Ca^{2+}$  from internal stores is followed by a  
344 plateau reflecting the influx of extracellular  $Ca^{2+}$  as a result of increased firing frequency  
345 (Figure 4D). In contrast to the biphasic response to Gnrh1 observed in Lh cells, we were not  
346 able to detect any changes (electrical or  $[Ca^{2+}]_i$ ) in Fsh cells following Gnrh1 exposure  
347 (Figure 4A and C).

348

### 349 **Effect of Gnrh1 on Fsh and Lh cells in live brain-pituitary tissue slices**

350           To further investigate the results observed in cell culture, we utilized brain-pituitary  
351 tissue slices from the double *tg(lhb:hrGfpII/fshb:DsRed2)* line to separately target Fsh and Lh  
352 cells for electrophysiological experiments. In Fsh cells, we observed oscillatory spontaneous  
353 electrical activity (Figure 5A), with cells switching from a non-firing quiescent state to an  
354 excited state marked by burst-like sequences lasting 20-80 s.

355 Surprisingly, contrary to the results in dispersed cell cultures, about 60% of the Fsh  
356 cells in the brain-pituitary slices responded to GnRH1 (a total of 16 cells from 8 pituitaries)  
357 (Figure 5B-F). All responding Fsh cells were located in close proximity to Lh cells. Both  
358 electrical and increased  $[Ca^{2+}]_i$  responses were either prolonged (i.e. lasting until the  
359 recording ended after 4-6 minutes; Figure 5B, C, and E) or transient (i.e. lasting from 40 s up  
360 to 5 minutes; Figure 5D and F) with a 1-5 s latency after addition of GnRH1. The typical  
361 electrical response to GnRH1 was a membrane depolarization (Figure 5B). In non-firing Fsh  
362 cells, the GnRH1-induced depolarization was sufficient to initiate a prolonged burst. In some  
363 cells we observed a weak hyperpolarization prior to depolarization (Figure 5C) without a  
364 change in firing activity. In Fsh cells spontaneously generating action potentials, GnRH1  
365 caused a membrane depolarization and in a few cases led to broadening of the action  
366 potential from 6-10 ms to over 20 ms. Some of the Fsh cells also responded to GnRH1 with  
367 small bursts (Figure 5D). The different GnRH1-induced responses were never observed in  
368 control experiments where we applied puff ejections of ECS onto cells. In fact, the electrical  
369 activity could not be changed even when doubling the puff application pressure.

370 The electrophysiological responses of Lh cells in brain-pituitary slices to GnRH1 were  
371 similar to those observed in dissociated cell culture. We saw a clear electrical response in all  
372 Lh cells following GnRH1 stimulation with similar latency as in Fsh cells. In 9 out of 13 cells  
373 (from 8 different pituitaries) we observed a biphasic response (Figure 6A). In the remaining 4  
374 Lh cells (3 different pituitaries) out of the 13, we observed a monophasic response in which  
375 GnRH1 initiated a direct depolarization of the cell membrane (Figure 6B). This depolarization  
376 was sufficient to initiate both transient and prolonged firing in previously quiescent cells. The  
377 electrical responses were also reflected in the different  $Ca^{2+}$  responses to GnRH1 (Figure 6C  
378 and D). Prolonged and robust  $Ca^{2+}$  responses to GnRH1 had two slightly different shapes. One  
379 response was clearly biphasic similar to what we observed in cell culture, with an initial  $Ca^{2+}$



380 peak (release of  $\text{Ca}^{2+}$  from internal stores) followed by a second phase plateau. The other  
381 GnRH1-induced response was prolonged but lack the second plateau following. Following an  
382 initial peak, the  $\text{Ca}^{2+}$  levels gradually decreased but not to basal levels (Figure 6C). In a few  
383 cells, we could only detect a transient  $\text{Ca}^{2+}$  response lasting less than a minute (Figure 6D)  
384 before returning to baseline values.

385

### 386 **Cell communication between gonadotrope cells in live brain-pituitary tissue slices**

387 The divergent effects of GnRH1 on Fsh cells in tissue slices and dissociated cell  
388 cultures, and the absence of detectable *gnrhr* mRNA in Fsh cells by FISH, led us to  
389 hypothesize that intercellular communication may mediate GnRH1-induced excitation in Fsh  
390 cells. To test for intercellular electrical communication, we utilized  $\text{Ca}^{2+}$  uncaging in one  
391 gonadotrope cell and recorded changes in membrane potential in neighboring gonadotropes  
392 (Figure 7A). Uncaging of  $\text{Ca}^{2+}$  causes membrane hyperpolarization via activation of  $\text{Ca}^{2+}$ -  
393 activated  $\text{K}^+$  channels (48). If there is direct electrical communication between two cells,  
394 altering the membrane potential in one cell should initiate changes in membrane potential in  
395 the other.

396 We observed that gonadotropes with soma-soma contact with an uncaged cell  
397 hyperpolarized within 15-20 ms of  $\text{Ca}^{2+}$  uncaging. We saw this rapid response in Fsh cell  
398 pairs (n = 11 cells from 3 different pituitaries) (Figure 7B) as well as Lh cell pairs (n = 13  
399 from 3 different pituitaries) (Figure 7C) and more importantly, in Fsh-Lh cell pairs (n = 7  
400 from 3 different pituitaries) (Figure 7D and E). This rapid propagation of the response is to  
401 the best of our knowledge too fast for the uncaged  $\text{Ca}^{2+}$  to diffuse from the target cell to the  
402 recorded cell and therefore points to direct electrical connection between the cells. Finally, to  
403 further explore intercellular communication, we tested whether  $\text{Ca}^{2+}$  uncaging could initiate  
404  $[\text{Ca}^{2+}]_i$  waves that reached surrounding cells. In fact, uncaging  $\text{Ca}^{2+}$  in Lh cells could generate

405 small waves that led to elevated  $[Ca^{2+}]_i$  in all Lh cells tested (n = 9 target cells from 3  
406 different pituitaries) (Figure 8A and B. Possible pathways illustrated in 8C). Typically, the  
407  $Ca^{2+}$  signal only propagated to neighboring cells reaching maximum of 3 cells from the target  
408 cell. In contrast, following uncaging in Fsh cells, we were only able to see propagation of  
409  $Ca^{2+}$  signal in 50% of the cells (n = 16 target cells from 3 pituitaries, data not shown).

410

## 411 DISCUSSION

412 In this study, we first show that the anatomical organization of the hypophysiotropic  
413 GnRH (Gnrh1 in medaka) is similar to other teleost species (2-5). The Gnrh1 axons project  
414 close to both Fsh and Lh cell as well as the pituitary blood vessels. Following, we find  
415 evidence that in female medaka, Gnrh1 stimulates Lh cells directly but Fsh cells indirectly,  
416 likely via interactions with directly activated Lh cells. This evidence is three-fold: 1) Fsh  
417 cells in female medaka lack expression of any of the three *gnrhr* paralogs present in the  
418 pituitary, whereas all Lh cells express at least one *gnrhr* paralog. 2) While Lh cells exhibited  
419 identical electrical and  $Ca^{2+}$  responses to Gnrh1 in dissociated pituitary cultures and in brain-  
420 pituitary tissue slices, Fsh cells showed no effect in dissociated pituitary cultures but did  
421 respond to Gnrh1 in brain-pituitary tissue slices. 3) Direct Lh cell activation rapidly induced  
422 electrical responses in neighboring Fsh cells. In addition, uncaging of  $Ca^{2+}$  in gonadotropes  
423 can initiate small  $[Ca^{2+}]_i$  waves that propagate to surrounding cells.

424

### 425 **Organization of gonadotrope cells and Gnrh1 fibers within the pituitary**

426 To separately investigate Fsh and Lh cells we established a new tg line with  
427 expression of red fluorescent protein, Dsred2, controlled by the endogenous medaka *fshb*  
428 promoter. We confirm the specificity of *dsred2* in *fshb* cells with multicolor FISH. Moreover,  
429 Burow et al (40) reported that *fshb* cells also express Fsh $\beta$  protein in the medaka pituitary.

430 Thus, we inferred that the *dsred2*-positive cells produce Fsh hormone and can therefore be  
431 referred to as Fsh cells. We then crossed *tg(fshb:DsRed2)* fish with fish from the previously  
432 established *tg(lhb:hrGfpII)* line (36,47) (Figure 1E-H) and examined the spatial distribution  
433 of Fsh and Lh cells. In agreement with prior studies in teleosts (7), in the double  
434 *tg(lhb:hrGfpII/fshb:DsRed2)* medaka Fsh and Lh were expressed by distinct pituitary cells,  
435 thereby validating its use to simultaneously study Fsh and Lh cells (Figure 1I-L).

436 Lh cells were found to be clustered in the ventral and lateral surface of the pituitary,  
437 whereas Fsh cells appeared more spread out and generally located more dorsally than Lh  
438 cells. However, Fsh cells were often found in close proximity, and in some cases appeared in  
439 direct contact, with other Fsh cells. Significantly, Fsh cells also appeared to make direct  
440 contact with Lh cells along the ventral line of the pituitary. Similar observations have been  
441 made in zebrafish (*Danio rerio*) where Fsh cells were found at the periphery of Lh-cell  
442 clusters (49).

443 Similar to that reported for other fish species (2-5), we found that *Gnrh1* neurons  
444 directly innervate the pituitary in female medaka. *Gnrh1* projections were seen throughout the  
445 PPD where both Fsh and Lh cells are located, and alongside blood vessels (Figure 2A -J).  
446 This organization is quite similar to that of *Gnrh3* neurons in zebrafish (5). We did not see  
447 projections terminating directly on gonadotrope cells, and therefore cannot determine if Fsh  
448 and Lh cells are directly targeted. Golan et al (5) reported that *Gnrh3* neurons innervating the  
449 pituitary in adult zebrafish had varicosity-like structures or boutons. In female medaka, we  
450 could not find such structures, but because we did not label the *Gnrh1* neurons with synaptic  
451 markers, we cannot rule out their existence. We did detect small blebs in close contact with  
452 blood vessels (Figure 2K and L). However, during pituitary sectioning, the orientation of  
453 blood vessels and *Gnrh1* neurons relative to the direction of the cut may introduce bouton-

454 like artifacts in transversally cut neurons. Therefore, additional studies are needed to clarify  
455 the exact morphology of the Gnrh1 projections and the precise location of the terminals.

456

#### 457 **Lh cells express *gnrhr*, but Fsh cells do not**

458 Four *gnrhr* paralogs have been identified in the medaka genome and expressed in the  
459 adult medaka brain (50). In a previous study, two of the *gnrhr* paralogs were found to be  
460 expressed in the adult female medaka pituitary, namely *gnrhr1b* and *gnrhr2a* (21). In the  
461 present study, we detected one additional paralog; *gnrhr2b*. Expression of multiple *gnrhr*  
462 paralogs in the pituitary has been observed in other teleost species including goldfish  
463 (*Carassius auratus*)(51), tilapia (*Oreochromis niloticus*)(28,52) and (*Astatotilapia*  
464 *burtoni*)(53), and Atlantic cod (*Gadus morhua*)(54). Using *in situ* hybridization on brain-  
465 pituitary slices from female medaka, we found *gnrhr* expressed in the median and posterior  
466 part of the pituitary. While *gnrhr1b* and *gnrhr2b* were expressed in the PI, only *gnrhr2a* was  
467 expressed in the PPD, and almost exclusively in Lh cells (Figure 3). These results support a  
468 previous study where *gnrhr2a* was the paralog showing the highest expression levels in the  
469 pituitary of both juvenile and adult medaka (50). The same study revealed that *gnrhr2a*  
470 expression levels increased in parallel with the number of pituitary Lh cells between juvenile  
471 and adult fish (50).

472 Interestingly, *lhb* cells from Atlantic cod were found to express *gnrhr1b* and *gnrhr2a*  
473 (54). More recently, a novel *gnrhr*, *gnrhr2baa*, was found in *lhb* cells from Atlantic salmon  
474 (29). It is interesting to note that the *gnrhr* identified in Lh cells from Atlantic salmon,  
475 Atlantic cod, and medaka belong to the same phylogenetic group, suggesting they share a  
476 common ancestral gene (29).

477 To our surprise, we did not co-localize any *gnrhr* with *fshb*. This contradicts previous  
478 reports of *gnrhr* expression in *fshb* cells from Atlantic cod (19,54) and tilapia (28). This

479 disparity may be due to species or sex differences, or to differences in methodology. The  
480 work in Atlantic cod was performed on primary dissociated pituitary cells pooled from both  
481 sexes and conducted at 2 to 7 days after plating (19,54). This difference in timing may be  
482 important, as a previous study found that *gnrhr* expression increased in pituitary cell culture  
483 over time (55), suggesting that either *gnrhr* expression increases in cells already expressing  
484 the receptor or that new cells start to express *gnrhr*. In tilapia, single-cell PCR found  
485 measurable *gnrhr* transcripts in *fshb* cells in fixed tissue; however, this study only analyzed  
486 pituitaries from males (28). Therefore, further studies are needed to clarify whether *gnrhr*  
487 expression patterns vary among species or between sexes. Notably, the expression pattern we  
488 report for female medaka is similar to that observed during embryogenesis in mouse, where  
489 FSH and LH are produced in distinct cells within the pituitary and during this time GnRHR  
490 are expressed exclusively in LH cells and not in FSH cells (56).

491

#### 492 **Effects of Gnrh1 on Fsh and Lh cells in cell culture**

493 In the present study both the electrophysiological recordings and  $\text{Ca}^{2+}$  changes in  
494 cultured cells treated with Gnrh1 are consistent with the *in situ* hybridization results. We  
495 found that female medaka Lh cells clearly responded to Gnrh1, inducing elevated  $[\text{Ca}^{2+}]_i$  and  
496 altered electrophysiological behavior. Conversely, we did not detect changes in membrane  
497 potential or  $\text{Ca}^{2+}$  levels in Fsh cells upon exposure to Gnrh1 up to 48 h after plating the  
498 dispersed pituitary cells. These results confirm that the *in situ* hybridization is adequately  
499 sensitive and all together suggest that unlike Lh cells, adult female medaka Fsh cells do not  
500 express *gnrhr*.

501 The response of Lh cells to Gnrh1 is consistent with that previously reported for other  
502 teleosts (19,21,22,43). However, very few studies have examined electrical activity or  
503 calcium flux of cultured teleost Fsh cells in response to Gnrh1. In dispersed Atlantic cod

504 pituitary cultures, GnRH increased action potential frequency and  $[Ca^{2+}]_i$  in Fsh cells,  
505 suggesting that Fsh cells possess functional GnRHr (19). However, as noted above, that study  
506 was conducted after the dispersed pituitary cells had been maintained for 2 to 7 days in  
507 culture, which may have induced phenotypic changes such as altered *gnrh* expression. As a  
508 result of these contradictory results, a more systematic testing of GnRH induced responses  
509 using primary pituitary cells should be conducted to reveal if gonadotrope cells alter their  
510 GnRHr composition with time in culture.

511

### 512 **Effects of GnRH1 on Fsh and Lh cells in brain-pituitary tissue slices**

513 Both Fsh and Lh cells fired spontaneous action potentials in brain-pituitary slices  
514 (Figure 5 and 6). In addition, long current clamp recordings of Fsh cells demonstrated  
515 membrane potential oscillations, with quiescent periods followed by weak depolarization and  
516 subsequent firing of action potentials. These longer bursts of spontaneous action potentials  
517 could mediate basal release of Fsh, but further experiments are needed to resolve their exact  
518 role. Using inverse-Pericam transgenic medaka, Karigo et al (20) observed that unstimulated  
519 Lh cells exhibited regular synchronized  $[Ca^{2+}]_i$  oscillations. Fsh cells had more  
520 desynchronized  $[Ca^{2+}]_i$  oscillations with lower peaks compared to Lh cells. However, the  
521 frequency of  $[Ca^{2+}]_i$  peaks were higher in Fsh cells. Importantly, the  $[Ca^{2+}]_i$  oscillations were  
522 demonstrated to be independent of GnRH (20).

523 Surprisingly, despite finding no expression of *gnrh* in Fsh cells, and no response to  
524 GnRH1 in dissociated Fsh cells, Fsh cells in brain-pituitary slices did respond to GnRH1 (Figure  
525 5). This result agrees with findings reported by Karigo et al (20) who showed that GnRH1  
526 elicited elevated  $[Ca^{2+}]_i$  levels in Fsh cells in whole brain-pituitary preparations from female  
527 medaka (20). Furthermore, this is the first clear demonstration that the effects of GnRH1 on  
528 Fsh cells are indirect.

529

### 530 **Cellular communication between gonadotrope cells**

531           Because Fsh cells respond to Gnrh1 in tissue slice preparations but not in dispersed  
532 cell cultures, and because they lack functional Gnrh receptors, we explored the possibility of  
533 communication between gonadotrope cells in pituitary slices (Figure 8). By using Ca<sup>2+</sup>  
534 uncaging and patch clamping on genetically labeled Fsh and Lh cells, we separately targeted  
535 the cells within the same preparation. Indeed, current clamp recordings demonstrated that not  
536 only is homotypic communication between Fsh cells or between Lh cells possible, but Fsh  
537 and Lh cells form heterotypic networks as well. Such cell-cell networks allow rapid electrical  
538 communication, whereby information received by one cell can be quickly relayed to several  
539 cells. Coupling of cells in the pituitary has been shown to greatly affect hormone release in  
540 both mammals and teleost fish (33,34,57,58). However, blocking gap junctions responsible  
541 for cytosolic bridging between cells had less impact on Gnrh induced Fsh release than Lh  
542 release in tilapia (34). This observation is consistent with our finding that the responses of  
543 Fsh cells to Gnrh1 were weaker than that of Lh cells. In fact, as previously reported, normal  
544 folliculogenesis is seen in Gnrh knockout medaka (13). In addition, in mammals only a 50%  
545 reduction in plasma FSH is observed in GnRH deficient *hpg* mouse (30). These results  
546 suggest that FSH is more dependent on other factors than GnRH. Therefore, additional  
547 investigations are required to identify all factors responsible in the differential regulation of  
548 Fsh and Lh.

549           In our experiments we clearly see that Ca<sup>2+</sup> uncaging in single cells can propagate  
550 between Lh cells (Figure 8) which may explain the synchronicity of the Ca<sup>2+</sup> flux in Lh cells  
551 observed by Karigo et al (20). Future studies combining uncaging with Ca<sup>2+</sup> imaging could  
552 reveal potential differences between Fsh and Lh cells in how Ca<sup>2+</sup> propagates between the  
553 cells.

554           To conclude, we provide evidence that while Lh cells in female medaka respond  
555 directly to GnRH1, Fsh cells do not. However, Fsh cells can respond to GnRH1 when they are  
556 associated with other pituitary cells. We also provide evidence of electrical signaling among  
557 gonadotropes. We propose that such signaling may play an important role in gonadotrope  
558 physiology and suggest that intercellular electrical signaling may mediate hormone release  
559 and permit Fsh cell response to GnRH1.



560 References

561

- 562 1. Knigge KM, Scott DE. Structure and function of the median eminence. *Am J Anat.*  
563 1970;129(2):223-243.
- 564 2. Ball JN. Hypothalamic control of the pars distalis in fishes, amphibians, and reptiles.  
565 *Gen Comp Endocrinol.* 1981;44(2):135-170.
- 566 3. Knowles F, Vollrath L. Synaptic contacts between neurosecretory fibres and  
567 pituicytes in the pituitary of the eel. *Nature.* 1965;206(4989):1168-1169.
- 568 4. Knowles F, Vollrath L. Neurosecretory innervation of the pituitary of the eels  
569 *Anguilla* and *Conger* I. The structure and ultrastructure of the neuro-intermediate lobe  
570 under normal and experimental conditions. *Phil Trans R Soc Lond B.*  
571 1966;250(768):311-327.
- 572 5. Golan M, Zelinger E, Zohar Y, Levavi-Sivan B. Architecture of GnRH-Gonadotrope-  
573 Vasculature Reveals a Dual Mode of Gonadotropin Regulation in Fish.  
574 *Endocrinology.* 2015;156(11):4163-4173.
- 575 6. Childs GV. Cytochemical studies of multifunctional gonadotropes. *Microsc Res Tech.*  
576 1997;39(2):114-130.
- 577 7. Kanda S, Okubo K, Oka Y. Differential regulation of the luteinizing hormone genes  
578 in teleosts and tetrapods due to their distinct genomic environments--insights into  
579 gonadotropin beta subunit evolution. *Gen Comp Endocrinol.* 2011;173(2):253-258.
- 580 8. Weltzien FA, Hildahl J, Hodne K, Okubo K, Haug TM. Embryonic development of  
581 gonadotrope cells and gonadotropic hormones--lessons from model fish. *Mol Cell*  
582 *Endocrinol.* 2014;385(1-2):18-27.

- 583 9. Nozaki M, Naito N, Swanson P, Miyata K, Nakai Y, Oota Y, Suzuki K, Kawauchi H.  
584 Salmonid pituitary gonadotrophs. I. Distinct cellular distributions of two  
585 gonadotropins, GTH I and GTH II. *Gen Comp Endocrinol.* 1990;77(3):348-357.
- 586 10. Schmitz M, Aroua S, Vidal B, Le Belle N, Elie P, Dufour S. Differential regulation of  
587 luteinizing hormone and follicle-stimulating hormone expression during ovarian  
588 development and under sexual steroid feedback in the European eel.  
589 *Neuroendocrinology.* 2005;81(2):107-119.
- 590 11. Gharib SD, Wierman ME, Shupnik MA, Chin WW. Molecular biology of the  
591 pituitary gonadotropins. *Endocr Rev.* 1990;11(1):177-199.
- 592 12. Schulz RW, Vischer HF, Cavaco JE, Santos EM, Tyler CR, Goos HJ, Bogerd J.  
593 Gonadotropins, their receptors, and the regulation of testicular functions in fish. *Comp*  
594 *Biochem Physiol B Biochem Mol Biol.* 2001;129(2-3):407-417.
- 595 13. Takahashi A, Kanda S, Abe T, Oka Y. Evolution of the hypothalamic-pituitary-  
596 gonadal axis regulation in vertebrates revealed by knockout medaka. *Endocrinology.*  
597 2016;157(10):3994-4002.
- 598 14. Swanson P, Dickey JT, Campbell B. Biochemistry and physiology of fish  
599 gonadotropins. *Fish Physiol Biochem.* 2003;28(1-4):53-59.
- 600 15. Levavi-Sivan B, Bogerd J, Mananos EL, Gomez A, Lareyre JJ. Perspectives on fish  
601 gonadotropins and their receptors. *Gen Comp Endocrinol.* 2010;165(3):412-437.
- 602 16. Burger LL, Dalkin AC, Aylor KW, Haisenleder DJ, Marshall JC. GnRH pulse  
603 frequency modulation of gonadotropin subunit gene transcription in normal  
604 gonadotropes-assessment by primary transcript assay provides evidence for roles of  
605 GnRH and follistatin. *Endocrinology.* 2002;143(9):3243-3249.

- 606 17. Dalkin AC, Haisenleder DJ, Ortolano GA, Ellis TR, Marshall JC. The frequency of  
607 gonadotropin-releasing-hormone stimulation differentially regulates gonadotropin  
608 subunit messenger ribonucleic acid expression. *Endocrinology*. 1989;125(2):917-924.
- 609 18. Haisenleder DJ, Dalkin AC, Ortolano GA, Marshall JC, Shupnik MA. A pulsatile  
610 gonadotropin-releasing hormone stimulus is required to increase transcription of the  
611 gonadotropin subunit genes: evidence for differential regulation of transcription by  
612 pulse frequency in vivo. *Endocrinology*. 1991;128(1):509-517.
- 613 19. Hodne K, Strandabo RA, von Krogh K, Nourizadeh-Lillabadi R, Sand O, Weltzien  
614 FA, Haug TM. Electrophysiological differences between *fshb*- and *lhb*-expressing  
615 gonadotropes in primary culture. *Endocrinology*. 2013;154(9):3319-3330.
- 616 20. Karigo T, Aikawa M, Kondo C, Abe H, Kanda S, Oka Y. Whole brain-pituitary in  
617 vitro preparation of the transgenic medaka (*Oryzias latipes*) as a tool for analyzing the  
618 differential regulatory mechanisms of LH and FSH release. *Endocrinology*.  
619 2014;155(2):536-547.
- 620 21. Strandabo RA, Gronlien HK, Ager-Wick E, Nourizadeh-Lillabadi R, Hildahl JP,  
621 Weltzien FA, Haug TM. Identified *lhb*-expressing cells from medaka (*Oryzias*  
622 *latipes*) show similar  $Ca^{2+}$ -response to all endogenous Gnrh forms, and reveal  
623 expression of a novel fourth Gnrh receptor. *Gen Comp Endocrinol*. 2016;229:19-31.
- 624 22. Strandabo RA, Hodne K, Ager-Wick E, Sand O, Weltzien FA, Haug TM. Signal  
625 transduction involved in GnRH2-stimulation of identified LH-producing  
626 gonadotropes from *lhb*-GFP transgenic medaka (*Oryzias latipes*). *Mol Cell*  
627 *Endocrinol*. 2013;372(1-2):128-139.
- 628 23. Ando H, Swanson P, Kitani T, Koide N, Okada H, Ueda H, Urano A. Synergistic  
629 effects of salmon gonadotropin-releasing hormone and estradiol-17 $\beta$  on gonadotropin

- 630 subunit gene expression and release in masu salmon pituitary cells in vitro. *Gen Comp*  
631 *Endocrinol* 2004;137(1):109-121.
- 632 24. Dickey JT, Swanson P. Effects of salmon gonadotropin-releasing hormone on follicle  
633 stimulating hormone secretion and subunit gene expression in coho salmon  
634 (*Oncorhynchus kisutch*). *Gen Comp Endocrinol*. 2000;118(3):436-449.
- 635 25. Yaron Z, Gur G, Melamed P, Rosenfeld H, Elizur A, Levavi-Sivan B. Regulation of  
636 fish gonadotropins. *Int Rev Cytol*. 2003;225:131-185.
- 637 26. Ikemoto T, Park M. Identification and molecular characterization of three GnRH  
638 ligands and five GnRH receptors in the spotted green pufferfish. *Mol cell endocrinol*.  
639 2005;242(1-2):67-79.
- 640 27. Moncaut N, Somoza G, Power DM, Canário AV. Five gonadotrophin-releasing  
641 hormone receptors in a teleost fish: isolation, tissue distribution and phylogenetic  
642 relationships. *J mol endocrinol*. 2005;34(3):767-779.
- 643 28. Parhar IS, Ogawa S, Sakuma Y. Three GnRH receptor types in laser-captured single  
644 cells of the cichlid pituitary display cellular and functional heterogeneity. *Proc Natl*  
645 *Acad Sci U S A*. 2005;102(6):2204-2209.
- 646 29. Ciani E, Fontaine R, Maugars G, Nourizadeh-Lillabadi R, Andersson E, Bogerd J,  
647 von Krogh K, Weltzien FA. Expression of Gnrh receptor gnrhr2bba exclusively in  
648 lhb-expressing cells in Atlantic salmon male parr. 2019; *Gen Comp Endocrinol*.  
649 *Submitted*.
- 650 30. Tsutsumi R, Webster NJ. GnRH pulsatility, the pituitary response and reproductive  
651 dysfunction. *Endocrine journal*. 2009;56(6):729-737.
- 652 31. Cattanach BM, Iddon CA, Charlton HM, Chiappa SA, Fink G. Gonadotrophin-  
653 releasing hormone deficiency in a mutant mouse with hypogonadism. *Nature*.  
654 1977;269(5626):338-340.

- 655 32. Duran-Pasten ML, Fiordelisio T. GnRH-induced  $\text{Ca}^{2+}$  signaling patterns and  
656 gonadotropin secretion in pituitary gonadotrophs. Functional adaptations to both  
657 ordinary and extraordinary physiological demands. *Front Endocrinol (Lausanne)*.  
658 2013;4:127.
- 659 33. Göngrich C, García-González D, Le Magueresse C, Roth LC, Watanabe Y, Burks DJ,  
660 Grinevich V, Monyer H. Electrotonic coupling in the pituitary supports the  
661 hypothalamic-pituitary-gonadal axis in a sex specific manner. *Front mol neurosci*.  
662 2016;9:65.
- 663 34. Golan M, Martin AO, Mollard P, Levavi-Sivan B. Anatomical and functional  
664 gonadotrope networks in the teleost pituitary. *Sci Rep*. 2016;6:23777.
- 665 35. Takahashi A, Islam MS, Abe H, Okubo K, Akazome Y, Kaneko T, Hioki H, Oka Y.  
666 Morphological analysis of the early development of telencephalic and diencephalic  
667 gonadotropin-releasing hormone neuronal systems in enhanced green fluorescent  
668 protein-expressing transgenic medaka lines. *J Comp Neurol*. 2016;524(4):896-913.
- 669 36. Hildahl J, Sandvik GK, Lifjeld R, Hodne K, Nagahama Y, Haug TM, Okubo K,  
670 Weltzien FA. Developmental tracing of luteinizing hormone beta-subunit gene  
671 expression using green fluorescent protein transgenic medaka (*Oryzias latipes*)  
672 reveals a putative novel developmental function. *Dev Dyn*. 2012;241(11):1665-1677.
- 673 37. Weltzien FA, Pasqualini C, Vernier P, Dufour S. A quantitative real-time RT-PCR  
674 assay for European eel tyrosine hydroxylase. *Gen Comp Endocrinol*. 2005;142(1-  
675 2):134-142.
- 676 38. Kim M, Gee M, Loh A, Rachatasumrit N. Ref-finder: a refactoring reconstruction tool  
677 based on logic query templates. In: Press A, ed. Proceedings of the Eighteenth ACM  
678 SIGSOFT International Symposium on Foundations of Software engineering, ser.  
679 FSE '10. New York. 2010:371-372.

- 680 39. Fontaine R, Affaticati P, Yamamoto K, Jolly C, Bureau C, Baloché S, Gonnet F,  
681 Vernier P, Dufour S, Pasqualini C. Dopamine inhibits reproduction in female  
682 zebrafish (*Danio rerio*) via three pituitary D2 receptor subtypes. *Endocrinology*.  
683 2013;154(2):807-818.
- 684 40. Burow S, Fontaine R, Von Krogh K, Mayer I, Nourizadeh-Lillabadi R, Hollander-  
685 Cohen L, Cohen Y, Shpilman M, Levavi-Sivan B, Weltzien FA. Medaka Follicle-  
686 stimulating hormone (Fsh) and Luteinizing hormone (Lh): Developmental profiles of  
687 pituitary protein and gene expression levels. *Gen Comp Endocrinol*. 2019;272:93-  
688 108.
- 689 41. Fontaine R, Weltzien FA. Labeling of blood vessels in the teleost brain and pituitary  
690 using cardiac perfusion with a DiI-fixative. *J Vis Exp*. 2019;(148):e59768.
- 691 42. Schindelin J, Arganda-Carreras I, Frise E, Kaynig V, Longair M, Pietzsch T,  
692 Preibisch S, Rueden C, Saalfeld S, Schmid B, Tinevez JY, White DJ, Hartenstein V,  
693 Eliceiri K, Tomancak P, Cardona A. Fiji: an open-source platform for biological-  
694 image analysis. *Nat Methods*. 2012;9(7):676-682.
- 695 43. Ager-Wick E, Hodne K, Fontaine R, von Krogh K, Haug TM, Weltzien FA.  
696 Preparation of a high-quality primary cell culture from fish pituitaries. *J Vis Exp*.  
697 2018;(138):e58159.
- 698 44. Fontaine R, Hodne K, Weltzien FA. Healthy brain-pituitary slices for  
699 electrophysiological investigations of pituitary cells in teleost fish. *J Vis Exp*.  
700 2018(138):e57790.
- 701 45. Edelstein AD, Tsuchida MA, Amodaj N, Pinkard H, Vale RD, Stuurman N.  
702 Advanced methods of microscope control using  $\mu$ Manager software. *J Biol Methods*.  
703 2014;1(2).

- 704 46. Schindelin J, Arganda-Carreras I, Frise E, Kaynig V, Longair M, Pietzsch T,  
705 Preibisch S, Rueden C, Saalfeld S, Schmid B, Tinevez J-Y, White DJ, Hartenstein V,  
706 Eliceiri K, Tomancak P, Cardona A. Fiji: an open-source platform for biological-  
707 image analysis. *Nat Methods*. 2012;9(7):676-682.
- 708 47. Fontaine R, Ager-Wick E, Hodne K, Weltzien FA. Plasticity of Lh cells caused by  
709 cell proliferation and recruitment of existing cells. *J Endocrinol*. 2019;240(2):361-  
710 377.
- 711 48. Halmes G, Haug TM, Einevoll G, Weltzien FA, Hodne K. A computational model for  
712 gonadotropin releasing cells in the teleost fish medaka. *PLOS Comput Biol*.  
713 2019;accepted.
- 714 49. Golan M, Biran J, Levavi-Sivan B. A novel model for development, organization, and  
715 function of gonadotropes in fish pituitary. *Front Endocrinol (Lausanne)*. 2014;5:182.
- 716 50. Strandabø RA, Grønlien HK, Ager-Wick E, Nourizadeh-Lillabadi R, Hildahl JP,  
717 Weltzien F-A, Haug TM. Identified *lhb*-expressing cells from medaka (*Oryzias*  
718 *latipes*) show similar Ca<sup>2+</sup>-response to all endogenous Gnrh forms, and reveal  
719 expression of a novel fourth Gnrh receptor. *Gen comp endocrinol*. 2016;229:19-31.
- 720 51. Illing N, Troskie BE, Nahorniak CS, Hapgood JP, Peter RE, Millar RP. Two  
721 gonadotropin-releasing hormone receptor subtypes with distinct ligand selectivity and  
722 differential distribution in brain and pituitary in the goldfish (*Carassius auratus*).  
723 *Proc Natl Acad Sci U S A*. 1999;96(5):2526-2531.
- 724 52. Parhar IS, Soga T, Sakuma Y, Millar RP. Spatio-temporal expression of  
725 gonadotropin-releasing hormone receptor subtypes in gonadotropes, somatotropes and  
726 lactotropes in the cichlid fish. *J Neuroendocrinol*. 2002;14(8):657-665.
- 727 53. Flanagan CA, Chen C-C, Coetsee M, Mamputha S, Whitlock KE, Bredenkamp N,  
728 Grosenick L, Fernald RD, Illing N. Expression, structure, function, and evolution of

- 729 gonadotropin-releasing hormone (GnRH) receptors GnRH-R1 SHS and GnRH-R2  
730 PEY in the teleost, *Astatotilapia burtoni*. *Endocrinology*. 2007;148(10):5060-5071.
- 731 54. von Krogh K, Bjorndal GT, Nourizadeh-Lillabadi R, Hodne K, Ropstad E, Haug TM,  
732 Weltzien FA. Sex steroids differentially regulate *fshb*, *lhb* and *gnrhr* expression in  
733 Atlantic cod (*Gadus morhua*). *Reproduction*. 2017;154(5):581-594.
- 734 55. Hodne K, von Krogh K, Weltzien FA, Sand O, Haug TM. Optimized conditions for  
735 primary culture of pituitary cells from the Atlantic cod (*Gadus morhua*). The  
736 importance of osmolality, pCO<sub>2</sub>, and pH. *Gen Comp Endocrinol*. 2012;178(2):206-  
737 215.
- 738 56. Wen S, Ai W, Alim Z, Boehm U. Embryonic gonadotropin-releasing hormone  
739 signaling is necessary for maturation of the male reproductive axis. *Proc Natl Acad*  
740 *Sci U S A*. 2010;107(37):16372-16377
- 741 57. Morand I, Fonlupt P, Guerrier A, Trouillas J, Calle A, Remy C, Rousset B, Munari-  
742 Silem Y. Cell-to-cell communication in the anterior pituitary: evidence for gap  
743 junction-mediated exchanges between endocrine cells and folliculostellate cells.  
744 *Endocrinology*. 1996;137(8):3356-3367.
- 745 58. Hodson DJ, Romanò N, Schaeffer M, Fontanaud P, Lafont C, Fiordelisio T, Mollard  
746 P. Coordination of calcium signals by pituitary endocrine cells in situ. *Cell calcium*.  
747 2012;51(3-4):222-230.
- 748  
749



750 **Table 1:** Genes, primers and accession numbers for cloning experiments.

751

752 **Table 2:** Percent sequence identity between *gnrhr* RNA probes and the mRNA for the  
753 different *gnrhr* paralogs in medaka.

754

755

756 FIGURE LEGENDS

757

758 **Figure 1: Confirmation of the Fsh $\beta$  and Lh $\beta$  reporter gene expression and generation of**

759 **the double transgenic line.** (A-D) Confocal images of parasagittal sections of medaka brain

760 and pituitary from the *fshb*-DsRed2 transgenic line, (E-H) the *lhb*-hrGfpII transgenic line, or

761 (I-L) the double transgenic line. (A-D) Tissue sections were labeled for *fshb* and *dsred2* by

762 FISH. (E-H) Tissue sections were labeled for *lhb* by FISH. (D), (H) and (L), represent the

763 merged images from the respective left panels together with nuclear (DAPI) staining.

764 Anterior to the left and dorsal to the top. Scale bars: 20  $\mu$ m.

765

766 **Figure 2: Pituitary innervation by genetically labeled Gnrh1 neurons.** (A-B) Z-

767 projections of confocal images from the whole pituitary without (A) or with nuclear (DAPI)

768 staining (B) from the *tg(gnrh1-eGfp)* line. Anterior to the top. (C-J) Confocal images of

769 parasagittal brain-pituitary sections from the *tg(gnrh1-eGfp)* labeled for Fsh $\beta$  (C-I) or Lh $\beta$

770 (G-J) by IF. (F) and (J) represent the merged images from the respective left panels together

771 with nuclear (DAPI) staining. (K-H) Z-projections (5  $\mu$ m z-stack) from confocal images of

772 parasagittal brain-pituitary sections from the siblings of the cross between *tg(gnrh1-eGfp)*

773 and *tg(fshb-DsRed2)*, i.e. *tg(gnrh1-eGfp/fshb-DsRed2)*, cardiac perfused with DiI. Scale bars:

774 20  $\mu$ m.

775

776 **Figure 3: *gnrh* receptor (*gnrhr*) expression in the pituitary.** (A) Graphic presenting the

777 relative expression (mean + SEM) of the four *gnrhr* paralogs in both male and female

778 medaka pituitary. (B) Schema presenting the area of expression of the three *gnrhr* expressed

779 in the pituitary and the location of the Fsh and Lh cells therefore summarizing the

780 observations in the remaining panels. (C-Z) Confocal images of brain-pituitary parasagittal  
781 sections double-labelled by FISH for *gnrhr1b* together with *fshb* (C-F) or *lhb* (G-J), *gnrhr2a*  
782 together with *fshb* (K-N) or *lhb* (O-R) or *gnrhr2b* together with *fshb* (S-V) or *lhb* (W-Z). (F),  
783 (J), (N), (R) and (V) represent the merged images from the respective left panels together  
784 with nuclear (DAPI) staining. Anterior to the left and dorsal to the top. Scale bars: 50  $\mu\text{m}$ .

785

786 **Figure 4: GnRH1-induced electrical and  $\text{Ca}^{2+}$  responses of Fsh and Lh cells from**  
787 **primary dispersed cell cultures.** The experiments were conducted in dispersed pituitary  
788 cells from adult female medaka, using *tg(lhb:hrGfpII/fshb:DsRed2)* for electrophysiology and  
789 *tg(lhb:hrGfpII)* or *(fshb:DsRed2)* for  $\text{Ca}^{2+}$  imaging. (A) Typical current clamp recording of a  
790 spontaneously firing Fsh cell. Following GnRH1 application (orange transparent bar  
791 overlaying the trace), no apparent changes in the electrical response could be observed (a  
792 total of  $n = 8$  cells from 3 different cell cultures combined). (B) Typical current clamp  
793 recording of a spontaneously firing Lh cell. GnRH1 application using puff ejections induced a  
794 biphasic response with an initial hyperpolarization followed by depolarization and increased  
795 firing and/or increase action potential duration (see also (43)). (C)  $\text{Ca}^{2+}$  imaging of an Fsh  
796 cell. Following GnRH1 application no response was observed in Fsh cells (a total of  $n = 10$   
797 cells from 3 different cell cultures combined). (D) GnRH1-induced  $\text{Ca}^{2+}$  response of an Lh  
798 cell. The Lh cells responded to GnRH1 with a biphasic increase in  $[\text{Ca}^{2+}]_i$  mirroring the  
799 electrical response in (A) (see details in (21,22)).

800

801 **Figure 5: Basal action potential firing properties and GnRH1-induced responses of Fsh**  
802 **cells in brain-pituitary slices.** The experiments were conducted using adult female medaka,  
803 *tg(lhb:hrGfpII/fshb:DsRed2)* for electrophysiology and *tg(fshb:DsRed2)* for  $\text{Ca}^{2+}$  imaging.  
804 (A) Prolonged current clamp recording of a spontaneous firing Fsh cell. The Fsh cells had

805 oscillatory firing properties where episodes of silence were followed by bursts of action  
806 potentials lasting 20-80 s. (B-D) Three types of electrical responses were observed in Fsh  
807 cells following Gnrh1 stimulation. (B) Current clamp recording of a non-firing Fsh cell.  
808 Gnrh1 application (orange transparent bar overlaying the trace) induced a monophasic  
809 response with membrane depolarization to threshold inducing action potentials. (C) Current  
810 clamp recording of a spontaneous firing Fsh cell. Gnrh1 elicited a weak biphasic response  
811 with an initial hyperpolarization but without any interruption in action potential pattern. The  
812 weak hyperpolarization was followed by a weak depolarization and increased action potential  
813 duration. (D) Current clamp recording of a spontaneous firing Fsh cell. Gnrh1 elicited a  
814 transient increase in firing frequency from 0.5-1 Hz to 2-3 Hz lasting 20-50 s. Two types of  
815  $\text{Ca}^{2+}$  responses were observed in Fsh cells, prolonged and transient following Gnrh1  
816 stimulation (E and F). (E)  $\text{Ca}^{2+}$  imaging of an Fsh cell stimulated by Gnrh1. The Fsh cells  
817 responded to Gnrh1 with increased  $[\text{Ca}^{2+}]_i$  with an initial peak followed by a gradual decline.  
818 The responses usually lasted more than 60 s. (F) Transient  $\text{Ca}^{2+}$  response to Gnrh1 was also  
819 observed in Fsh cells, lasting 20-50 s.

820

821 **Figure 6: Gnrh1-induced electrical and  $\text{Ca}^{2+}$  responses of Lh cells in brain-pituitary**  
822 **slices.** The experiments were conducted using adult female medaka,  
823 *tg(lhb:hrGfpII/fshb:DsRed2)* for electrophysiology and the *tg(lhb:hrGfpII)* for  $\text{Ca}^{2+}$  imaging.  
824 Two types of Gnrh1-induced responses could be observed in Lh cells. (A) Typical current  
825 clamp recording of a spontaneous firing Lh cell. Gnrh1 stimulation (orange transparent bar  
826 overlaying the trace) induced a biphasic response with an initial hyperpolarization followed  
827 by a depolarization and increased firing and/or increase action potential duration. (B) Current  
828 clamp recording of a quiescent Lh cell. Gnrh1 elicited a monophasic response with a  
829 depolarization of the cell membrane to threshold, inducing action potentials. (C)

830  $\text{Ca}^{2+}$  responses of an Lh cell stimulated by Gnrh1. The Lh cells responded to Gnrh1 with  
831 either a biphasic increase in  $[\text{Ca}^{2+}]_i$  mirroring the electrical response in (A) or a prolonged  
832 response with an initial  $[\text{Ca}^{2+}]_i$  peak followed by a gradual decrease. The responses usually  
833 lasted more than 60 s. (D) A few Lh cells responded to Gnrh1 with a transient elevation in  
834  $[\text{Ca}^{2+}]_i$  lasting 20-50 s.

835

836 **Figure 7: Electrophysiological responses to uncaging of  $\text{Ca}^{2+}$  in neighboring**  
837 **gonadotrope cells.** The experiments were conducted using adult female  
838 *tg(lhb:hrGfpII/fshb:DsRed2)*. (A) A schematic overview of the experimental procedure of  
839 simultaneous uncaging and current clamp (voltage) recordings performed on gonadotrope  
840 cells from brain-pituitary slices. (B-E) Recording of the electrophysiological response in  
841 different gonadotrope cells following uncaging in neighboring cell. (B) Voltage recording of  
842 an Fsh cell, uncaging in neighboring Fsh cell. (C) Voltage recording of an Lh cell and  
843 uncaging in neighboring Lh cell. (D) Voltage recording of an Lh cell and uncaging in  
844 neighboring Fsh cell. (E) Voltage recording of an Fsh cell and uncaging in neighboring Lh  
845 cell.

846

847 **Figure 8:  $\text{Ca}^{2+}$  responses in surrounding cells following uncaging in Lh cells.** (A, B)  $\text{Ca}^{2+}$   
848 responses in neighboring cells following uncaging in an Lh cell (green color). The laser  
849 simultaneously uncaged the  $\text{Ca}^{2+}$  and bleached the target cell, allowing verification of the  
850 precise location of the uncaging. (A) A 300 ms laser pulse targeting one Lh cell elicited a  
851 robust  $\text{Ca}^{2+}$  response in three surrounding cells. Upper panel, representative images of the  
852 response. Lower, traces of the three responses calculated as  $F/F_0$  following background  
853 subtractions. (B) Same as (A) but only one neighbor cell responded to the uncaging. (C)

854 Overview of possible mechanisms responsible for the electrical response and the  $\text{Ca}^{2+}$

855 response to uncaging of  $\text{Ca}^{2+}$ . Scale bars in A and B: 10  $\mu\text{m}$ .

856

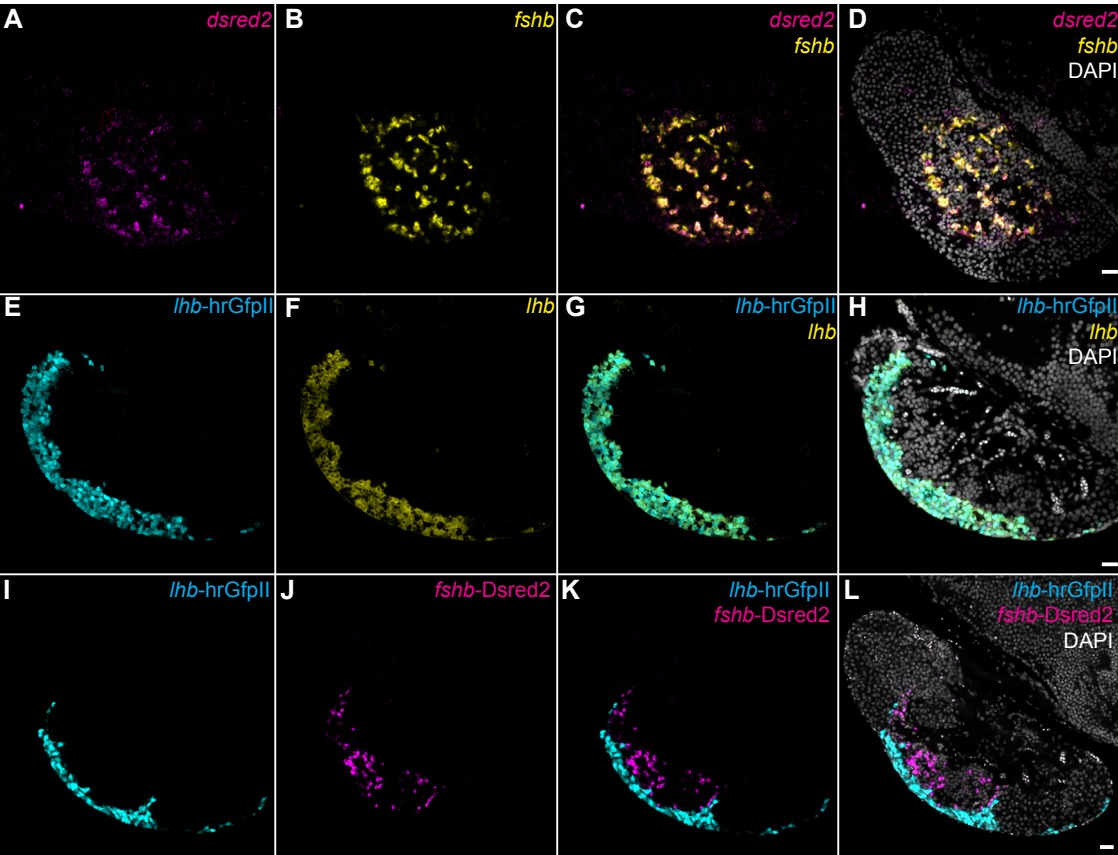

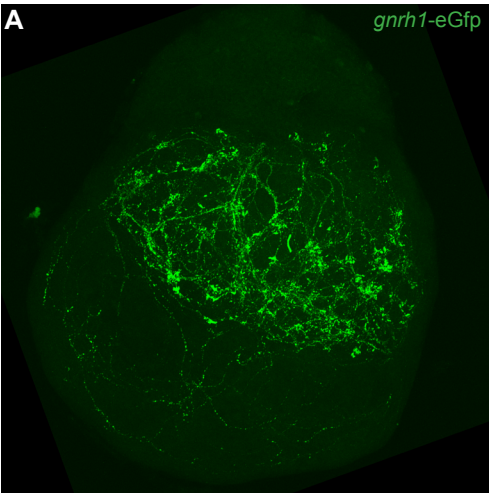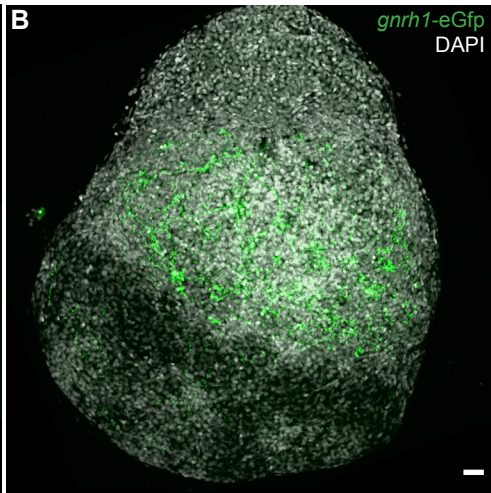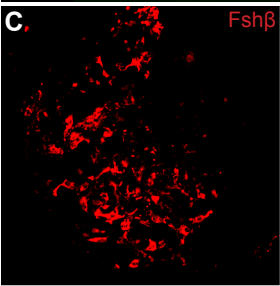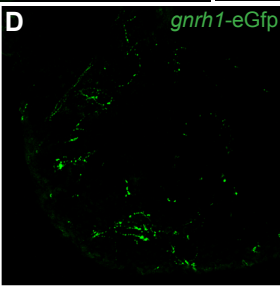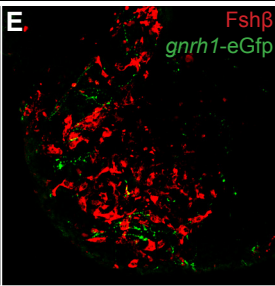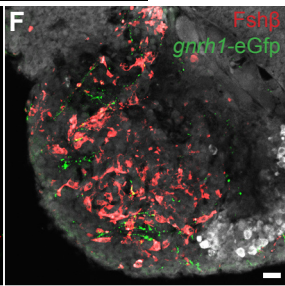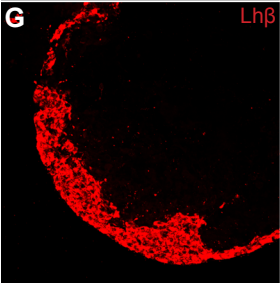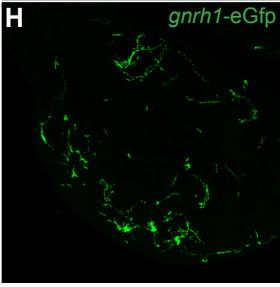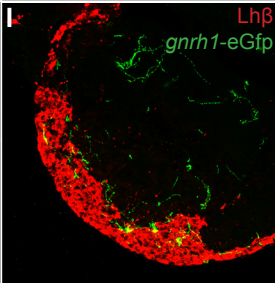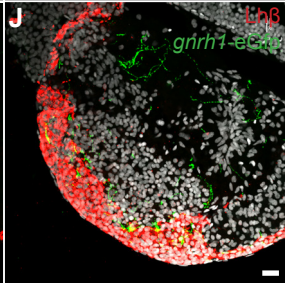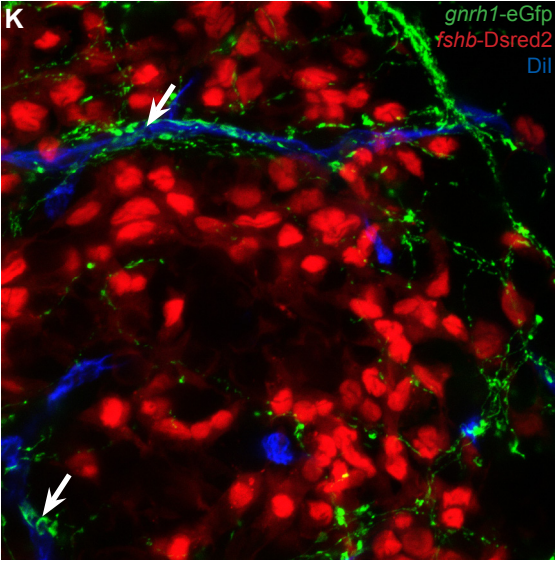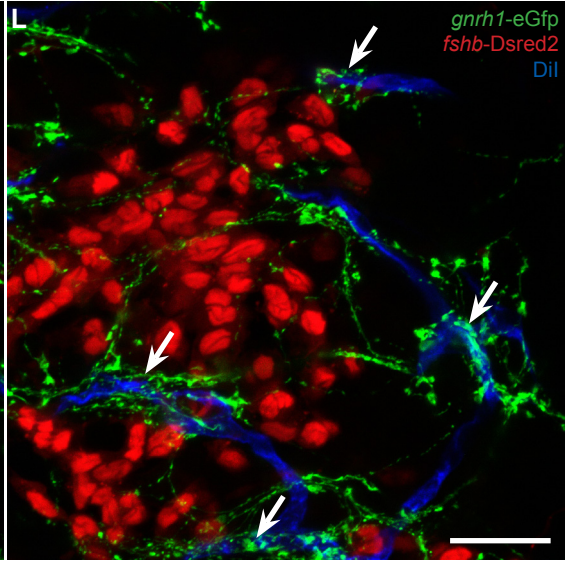



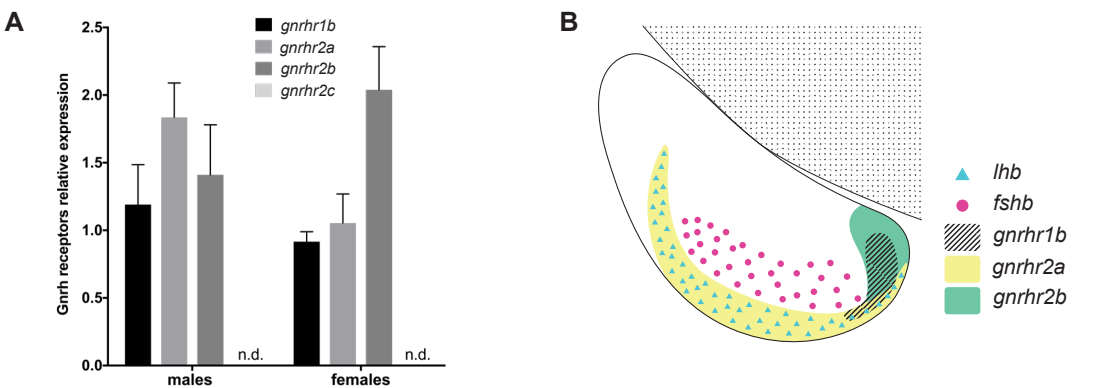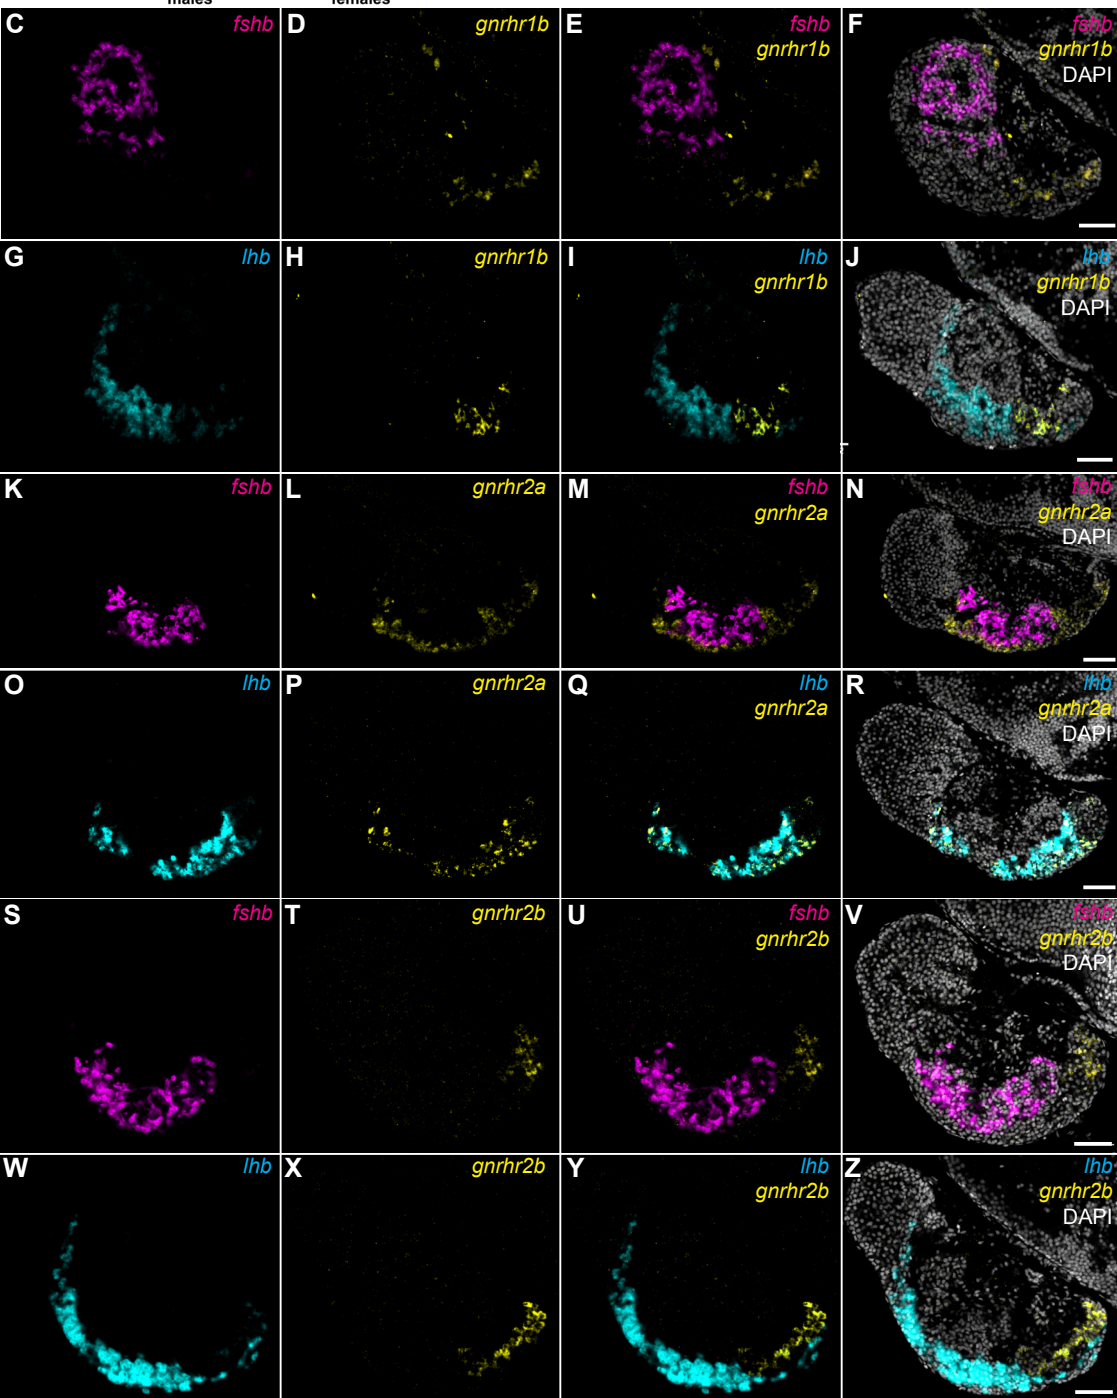

**A**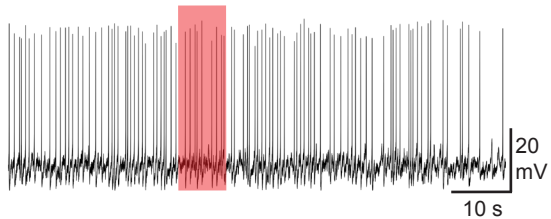**B**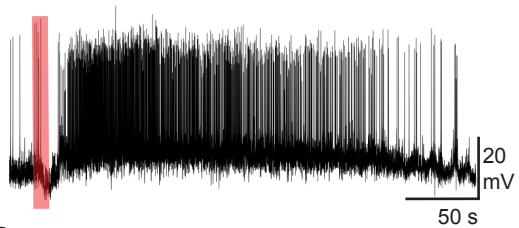**C**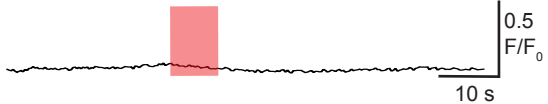**D**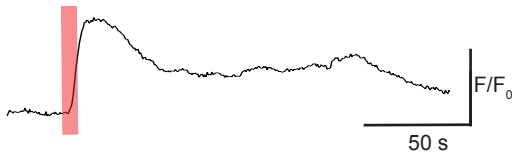

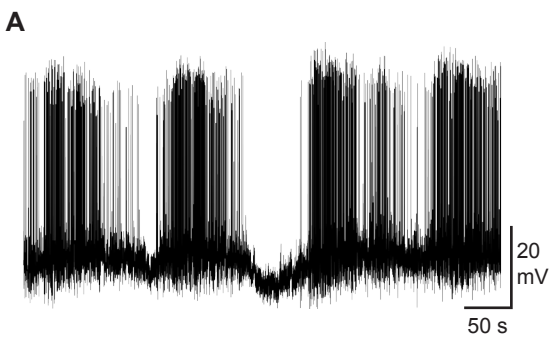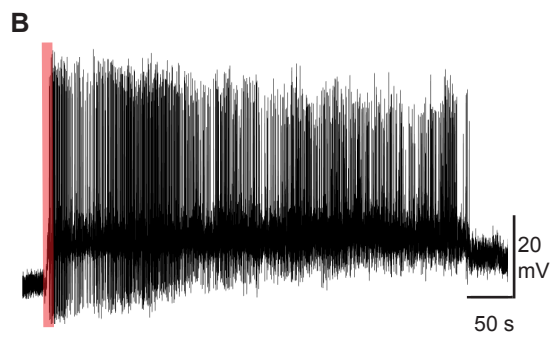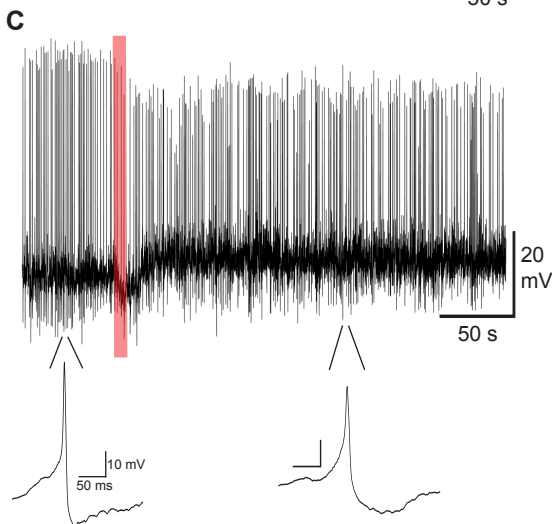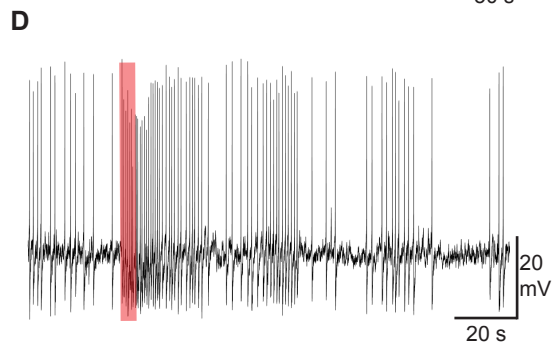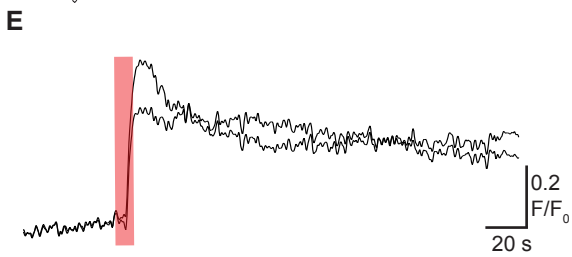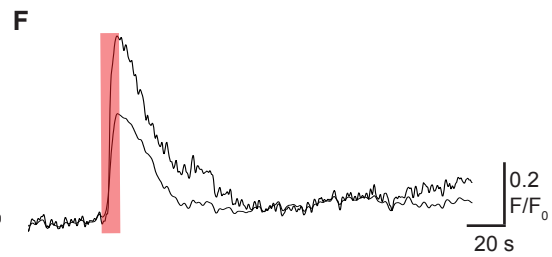

**A**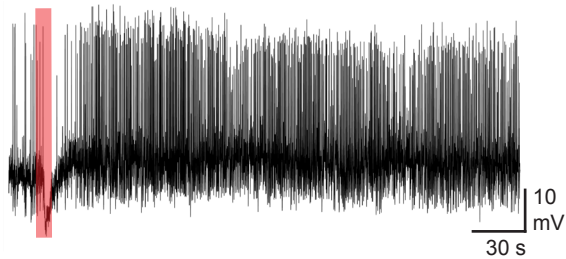**B**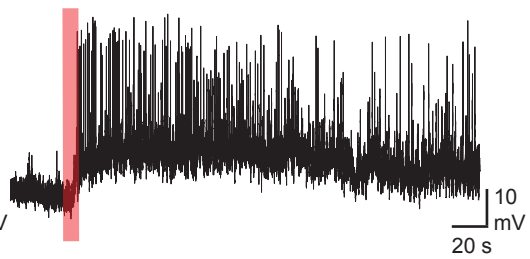**C**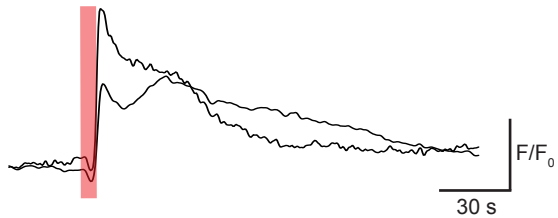**D**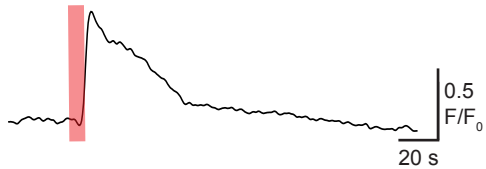

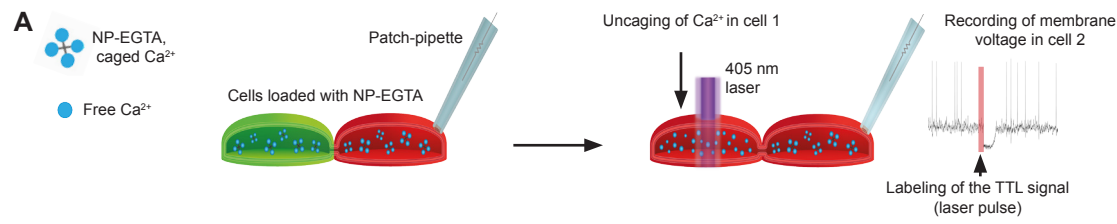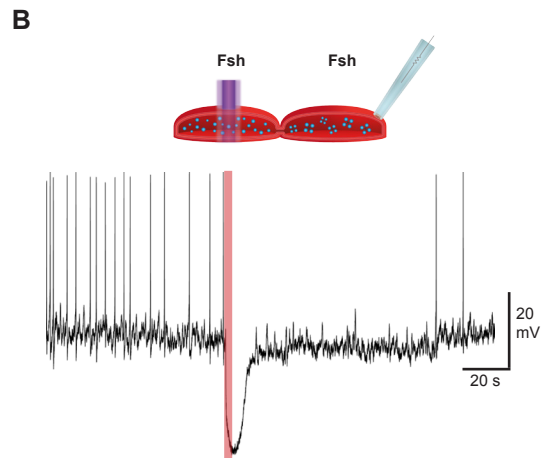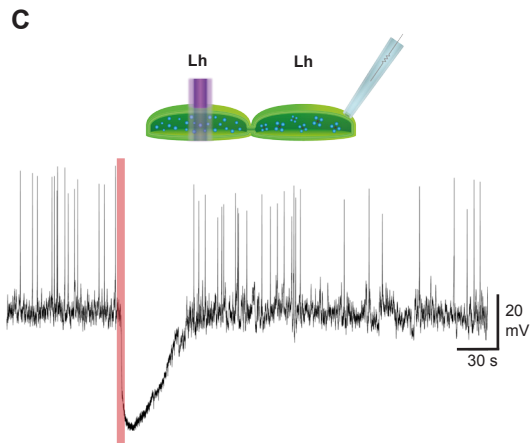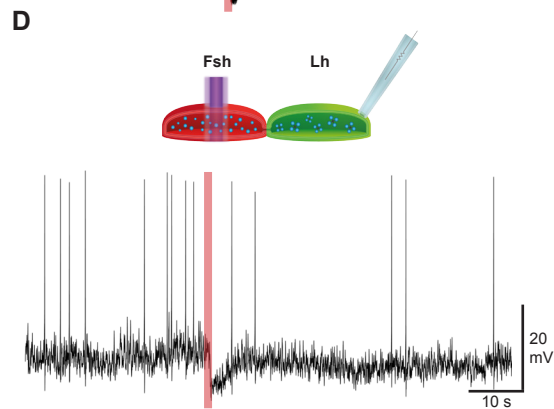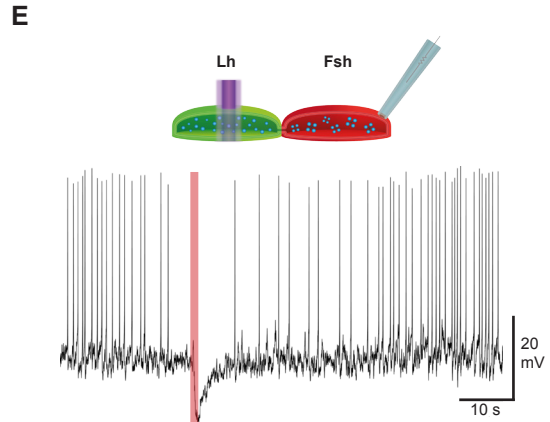

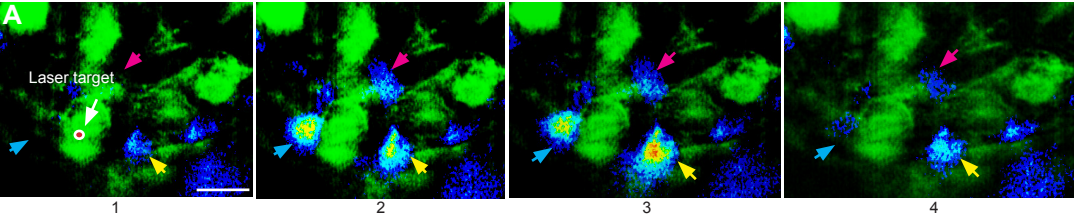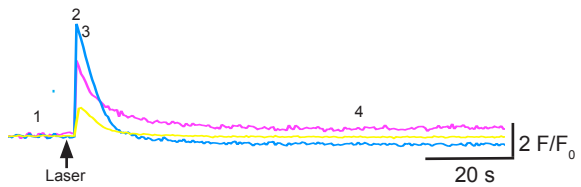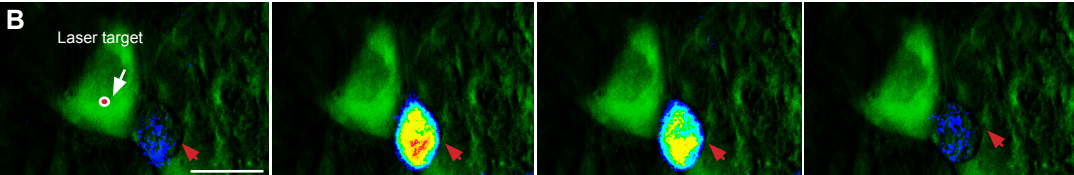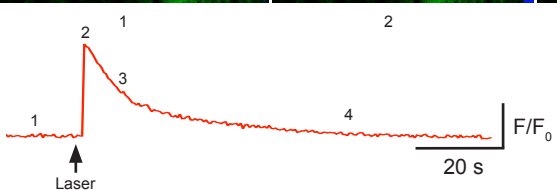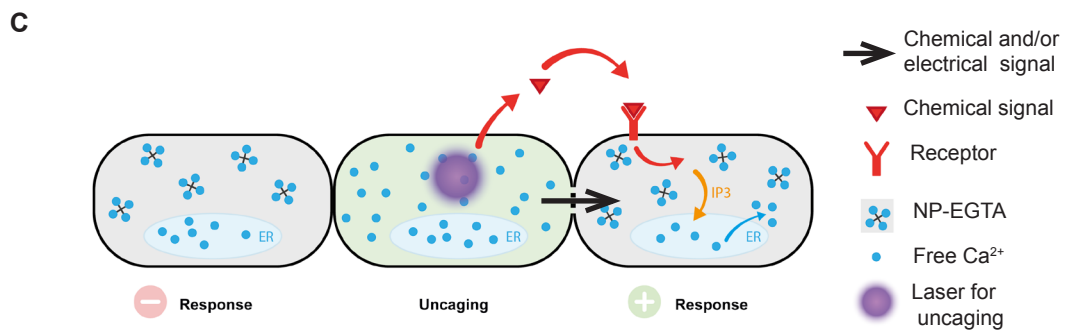

Primers for cloning, qPCR and in situ

|                | <b>name</b>   | <b>forward</b>           | <b>reverse</b>            | <b>size of the sequence(bp)</b> |
|----------------|---------------|--------------------------|---------------------------|---------------------------------|
| <b>Cloning</b> | fshb promotor | GGCAACCTCCCTGACTGGCCTAAA | CAGTTAGCCGCCCATGCCGCTGCAG | 3833                            |
| <b>qPCR</b>    | gnrh-r1b      | TCCTGCTACACATCCACCAG     | GCCTTTGGGATGATGTCTGT      | 88                              |
|                | gnrh-r2a      | GGGCGATGAGTGTGATCCTC     | CCCGAGTGGCACATTGAGT       | 96                              |
|                | gnrh-r2b      | TTGAGATATCAAGCCGCATC     | GAGTCCTCATCCGAGCTTTG      | 99                              |
|                | gnrh-r2c      | TTCAGATCTCCAAGCAGATGAC   | GGGATGTTGTTCTTTGAGCAG     | 79                              |
| <b>in situ</b> | fshb          | GAGGAAGCAACACTTTTCAGC    | GCACAGTTTCTTTATTTTCAGTGC  | 500                             |
|                | dsred2        | AGTTCATGCGCTTCAAGGTG     | GTGTAGTCCTCGTTGTGGGA      | 598                             |
|                | gnrh-r1b      | CTCTTTTCTCCAGGATGACGG    | TCATGCTCCCCACTGTGAG       | 1102                            |
|                | gnrh-r2a      | ATGAGCAAGCCAACATCAGC     | GGCTGGACTGGTTGAGAGAT      | 1203                            |
|                | gnrh-r2b      | CGGTCTGTGGTATTGGCTTT     | ACTGGCTCCTCTGGAAGTGA      | 876                             |

bioRxiv preprint doi: <https://doi.org/10.1101/763250>; this version posted September 9, 2019. The copyright holder for this preprint (which was not certified by peer review) is the author/funder, who has granted bioRxiv a license to display the preprint in perpetuity. It is made available under aCC-BY-NC-ND 4.0 International license.

Percentage identity

| probe/mRNA | gnrh-r1b | gnrh-r2a | gnrh-r2b |
|------------|----------|----------|----------|
| gnrh-r1b   | 100      | 56.2     | 57.7     |
| gnrh-r2a   | 56.2     | 100      | 58.2     |
| gnrh-r2b   | 41.1     | 41.2     | 100      |
